# Supplementary material for: Effectiveness of mHealth Interventions in the Control of Lifestyle and Cardiovascular Risk Factors in Patients After a Coronary Event: Systematic Review and Meta-analysis
Source: PubMed Central journal article supplement (PMC9758644; doi:10.2196/39593), 2022-12-02

**Supplementary figures S1. Funnel plots for outcome variables.**

**BMI**

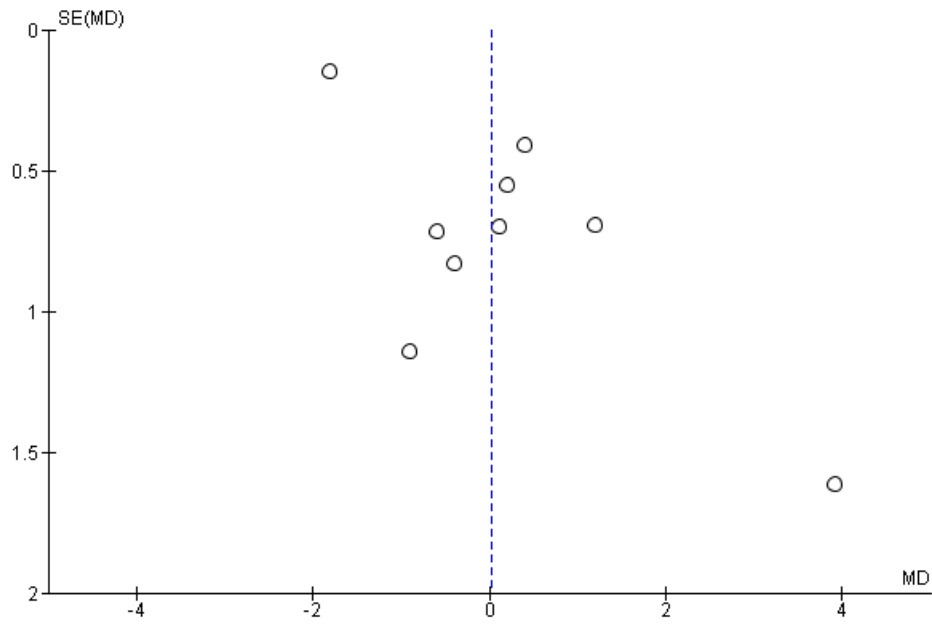

**SBP**

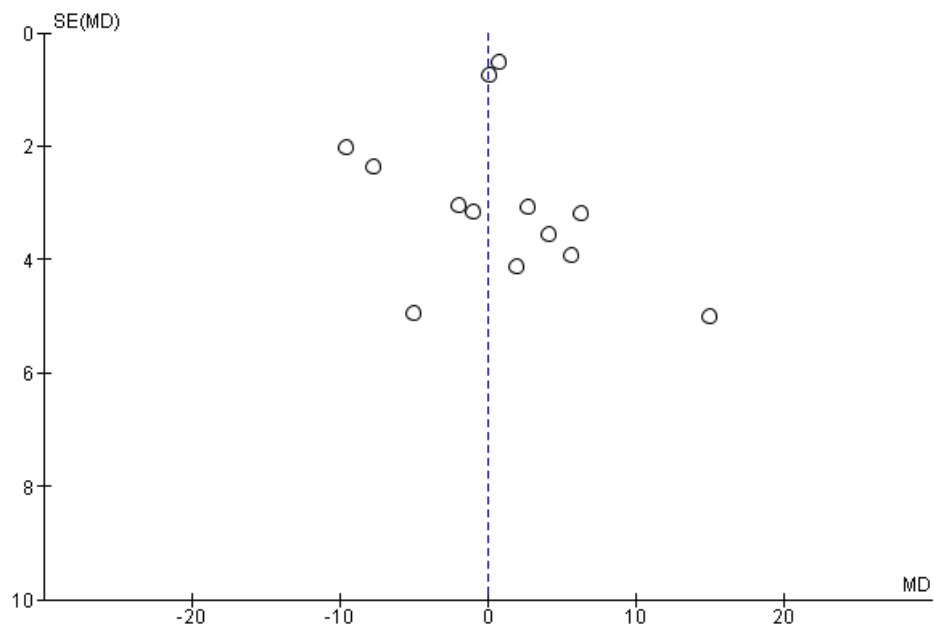

### DBP

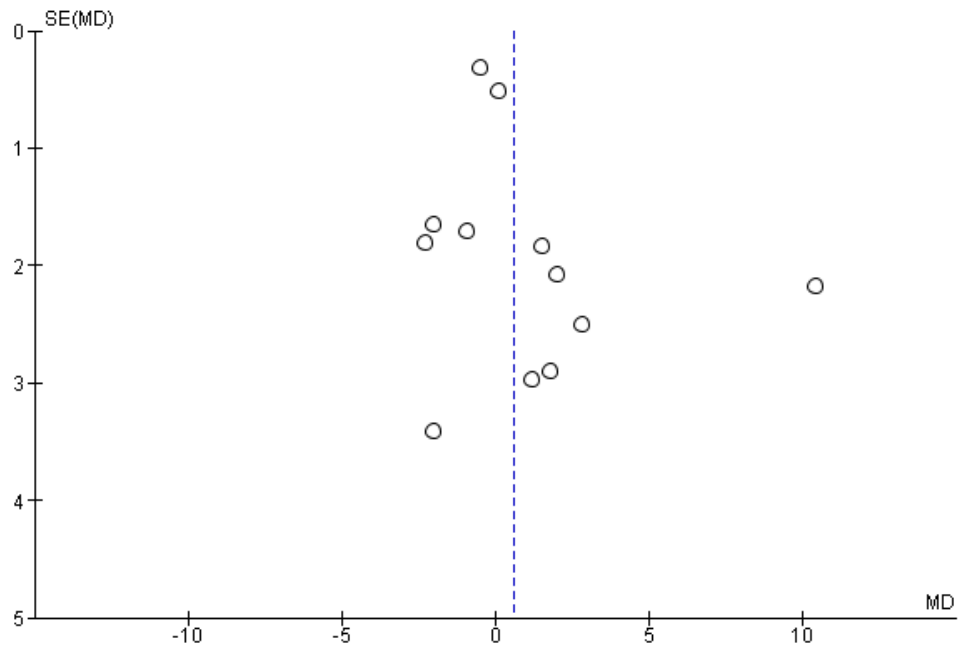

### Total cholesterol

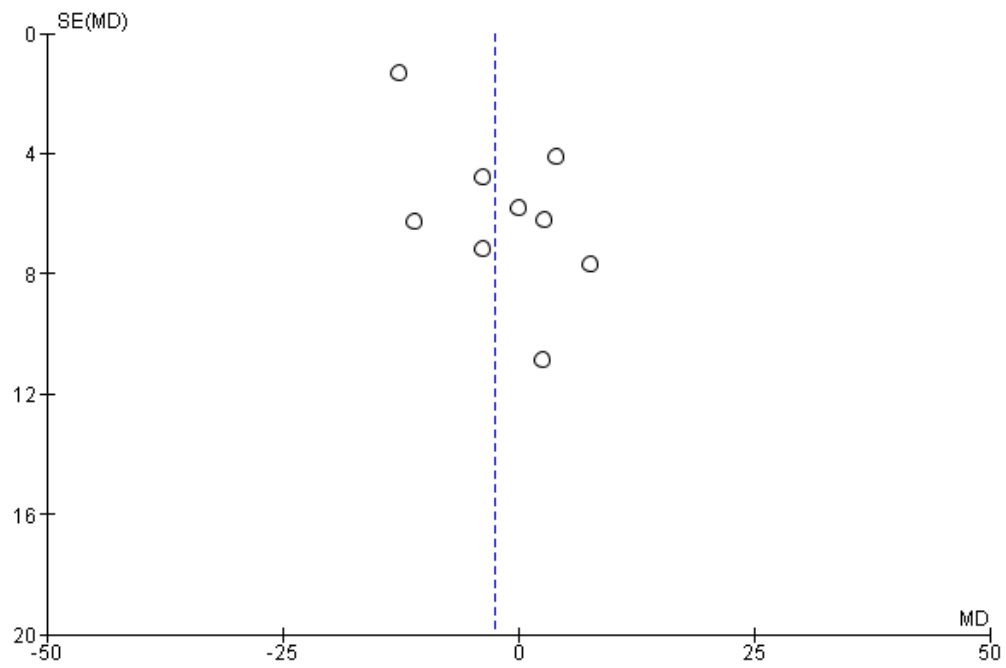

### LDL cholesterol

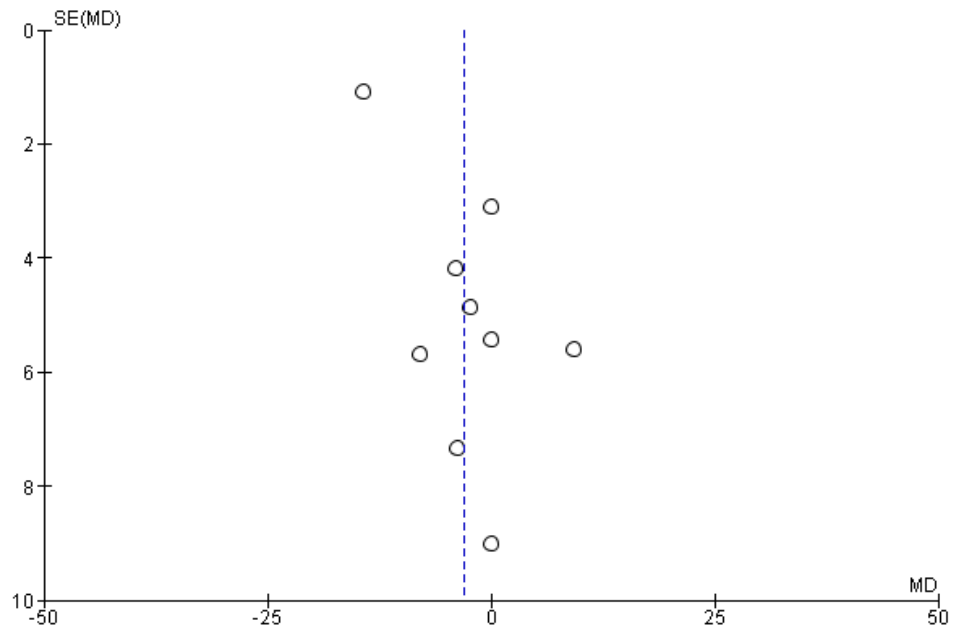

### HDL cholesterol

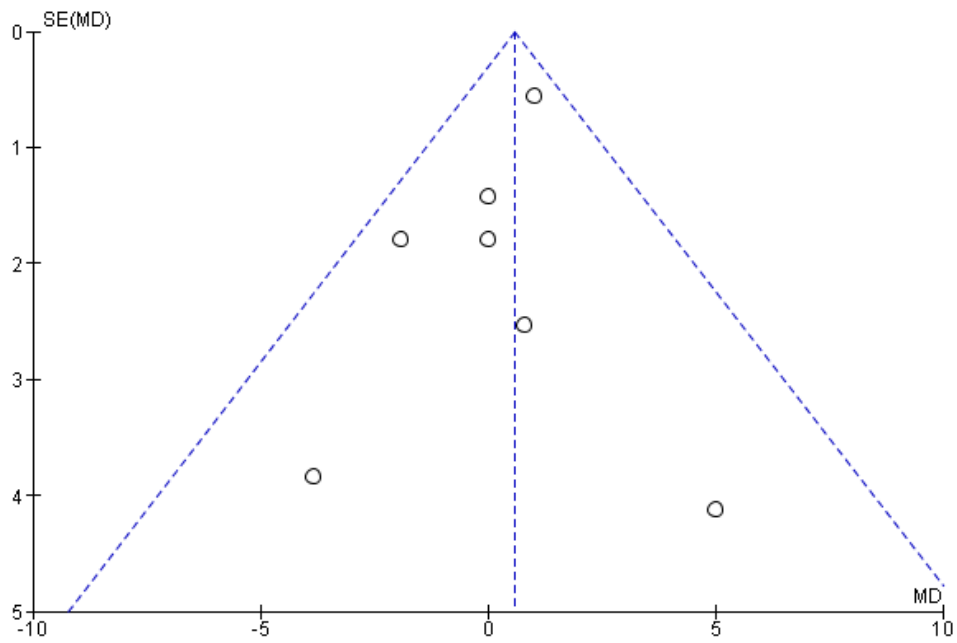

### Tryglicerides

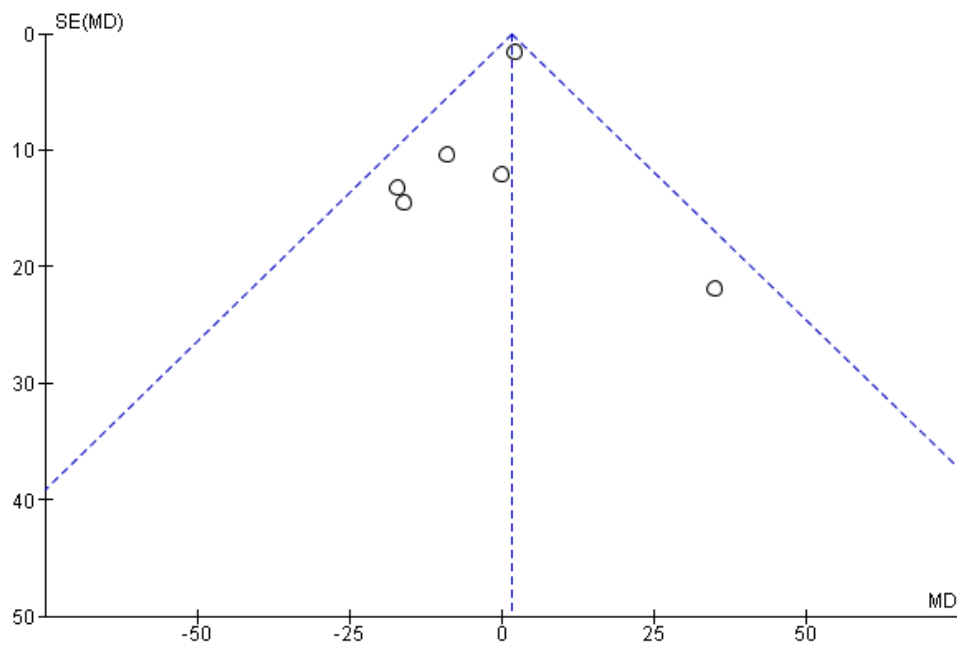

### HbA1c

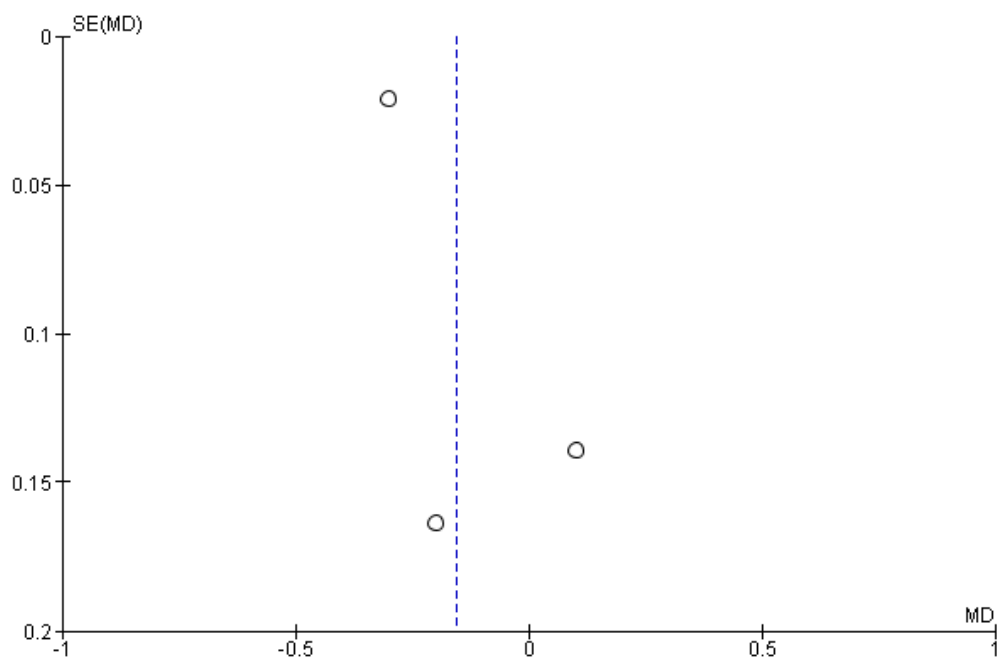

### Glucose

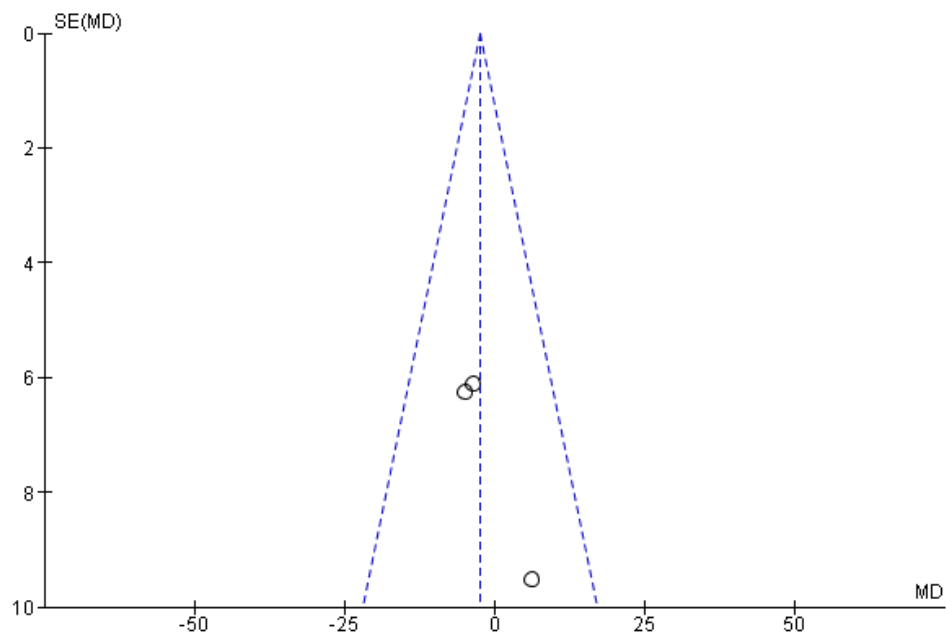

### 6 minutes walking test

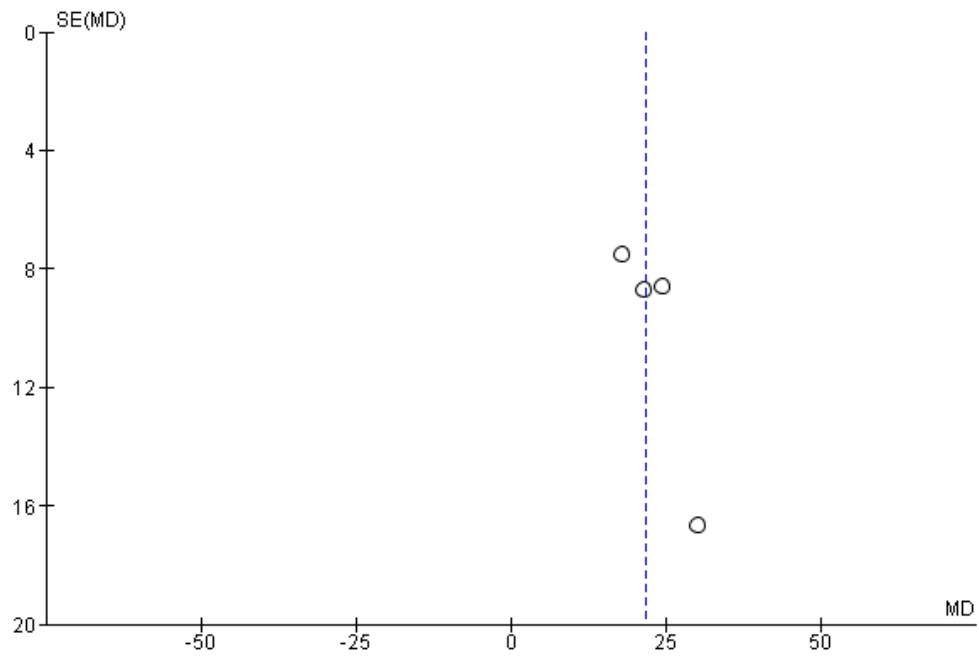

### Heart rate

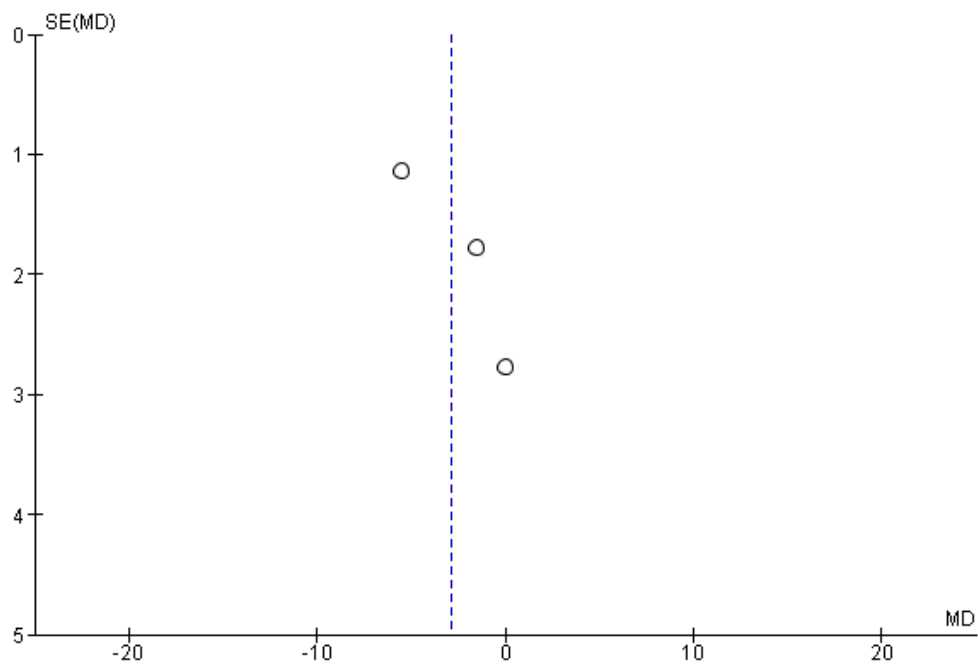

### Waist circumference

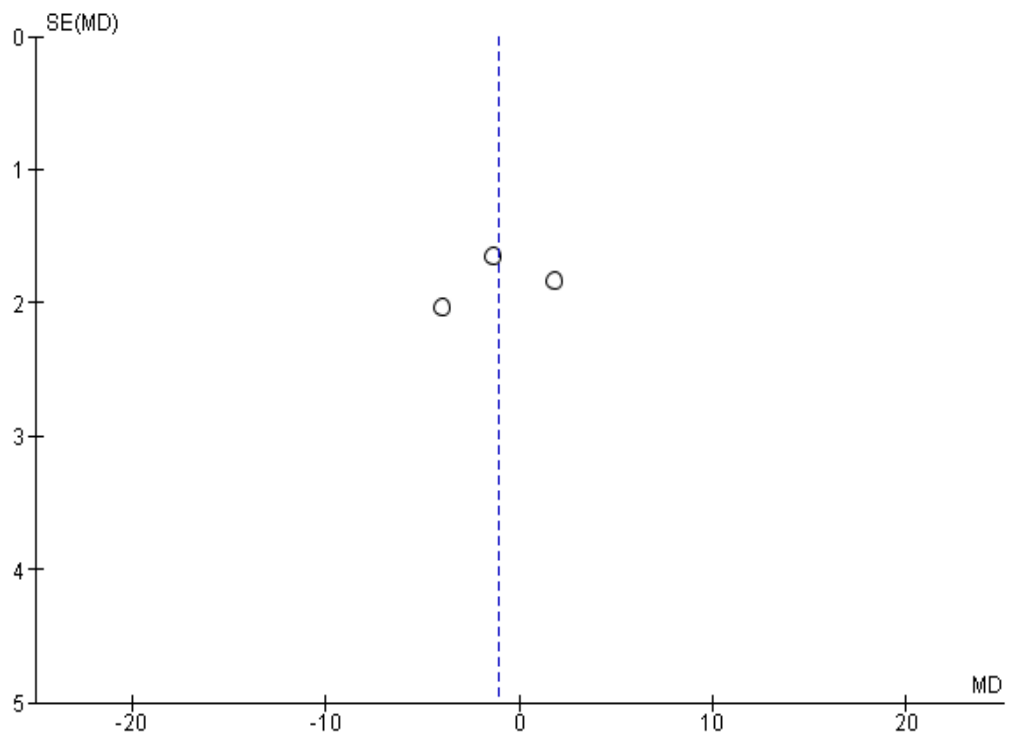

### Anxiety

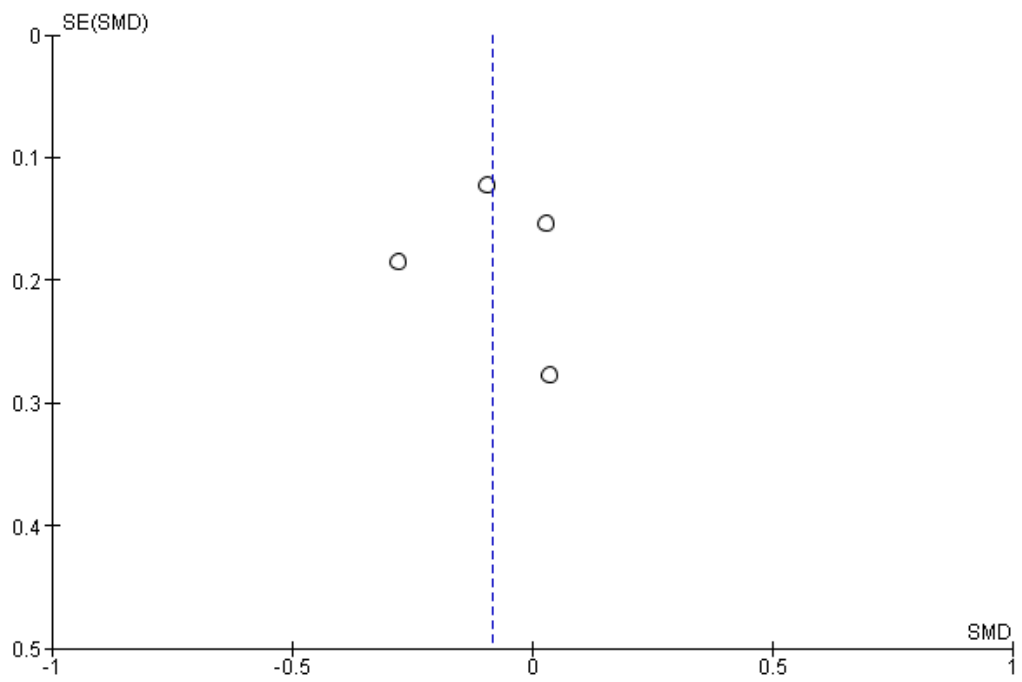

### Depression

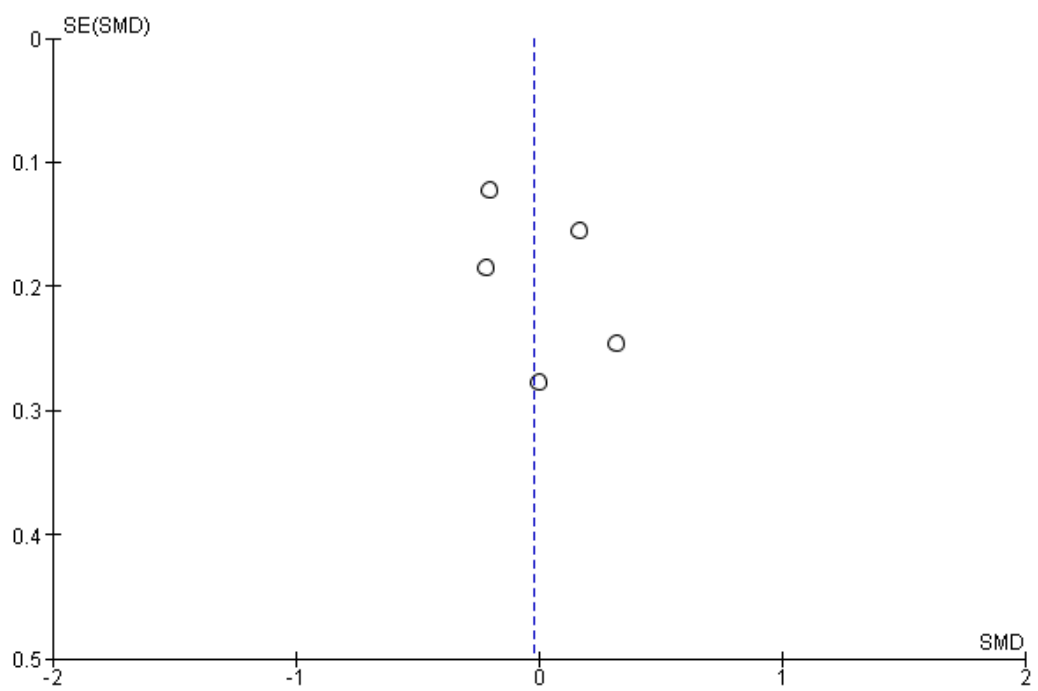

### Quality of life. General

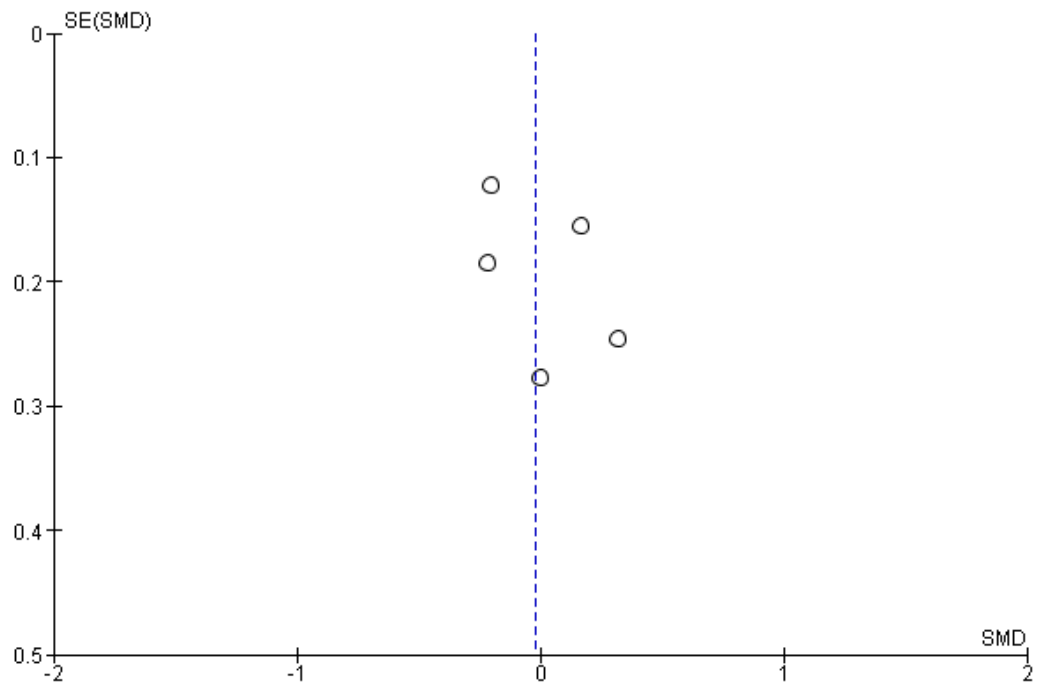

### Quality of life. Physical dimensión or physical health

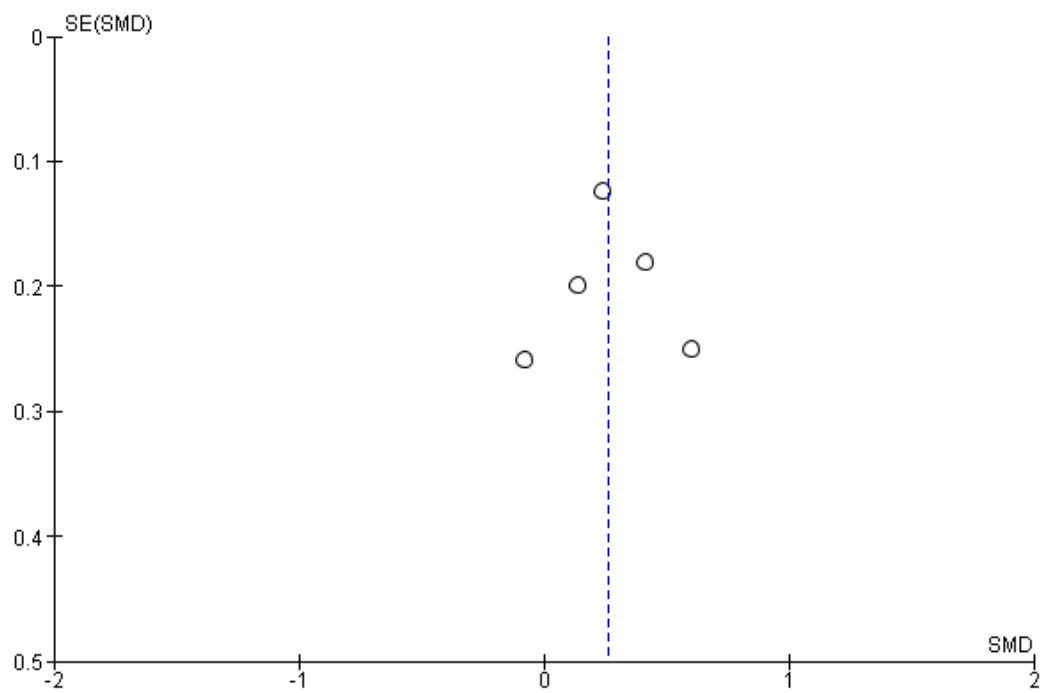



### Quality of life. Mental dimension or mental health

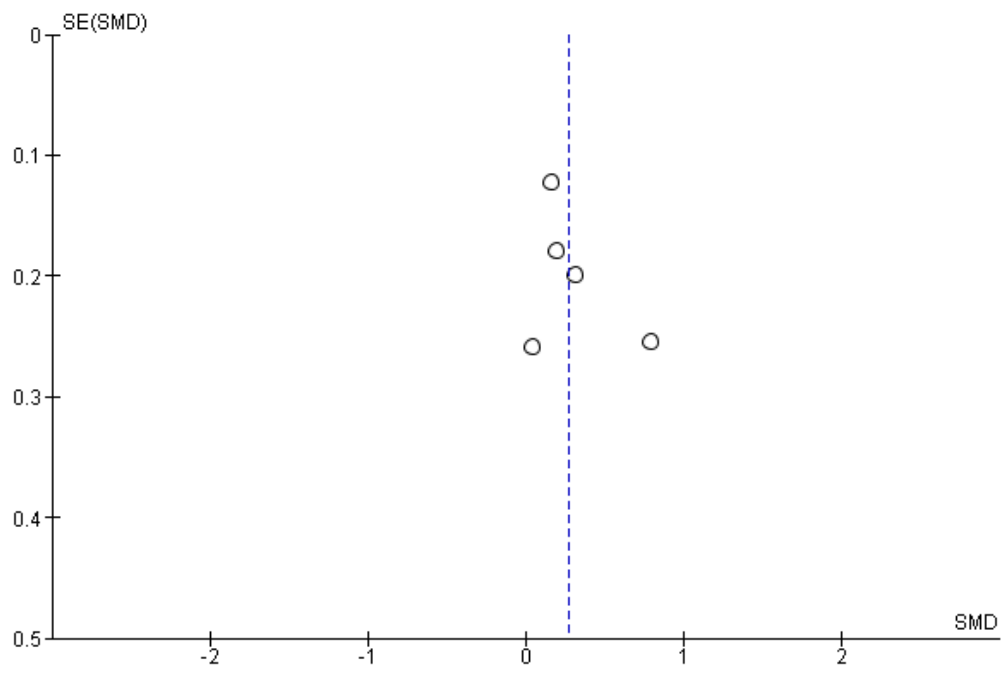

### VO2 peak

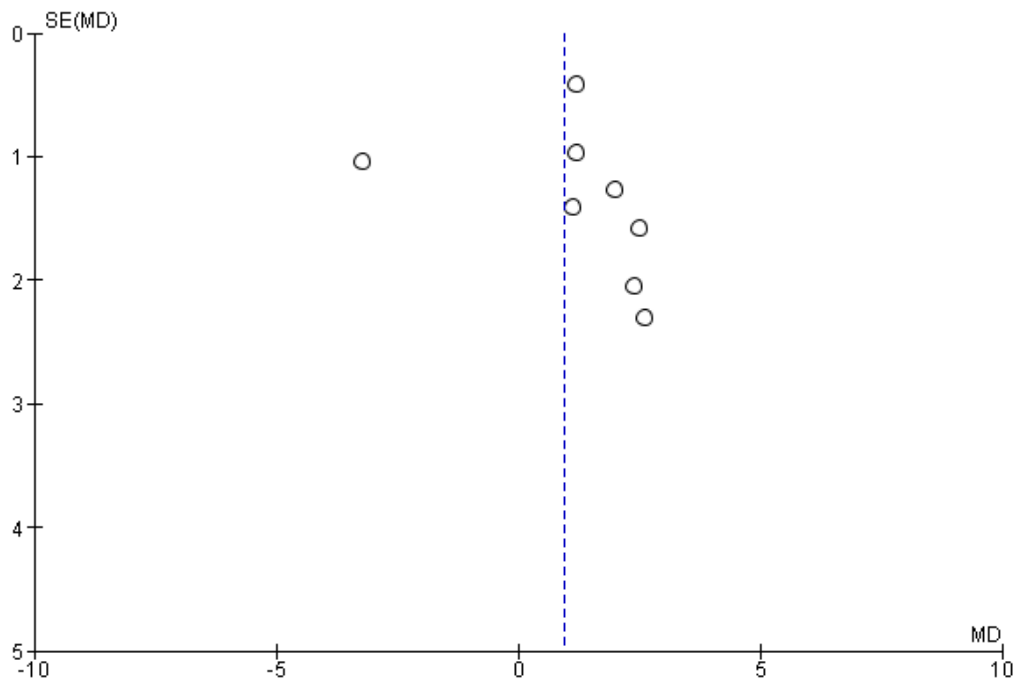

### Physical activity

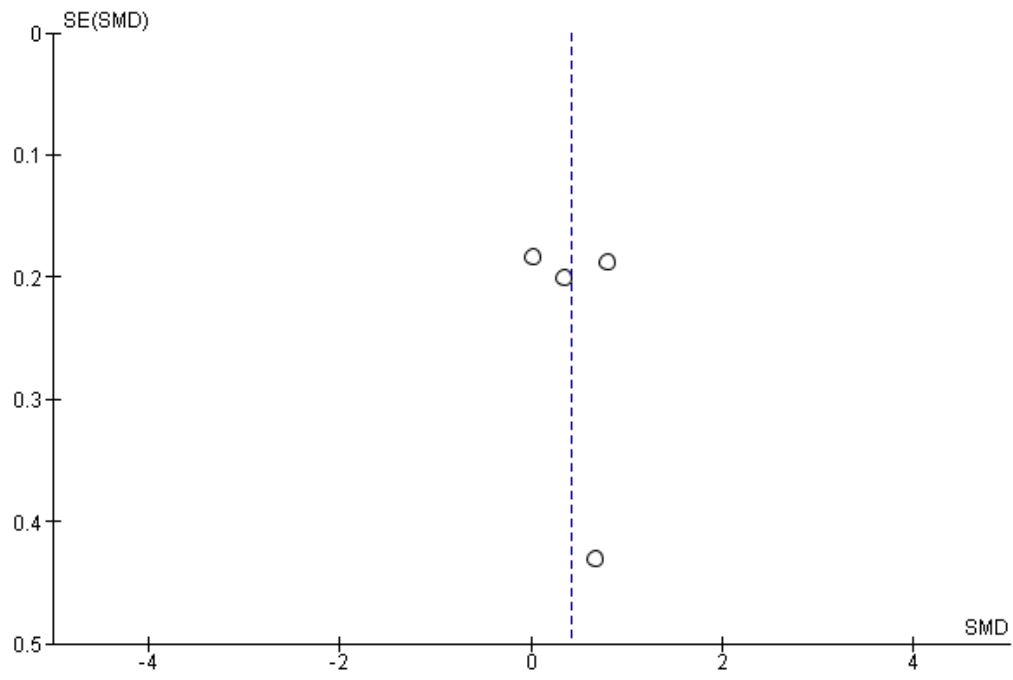

### Adherence to medications

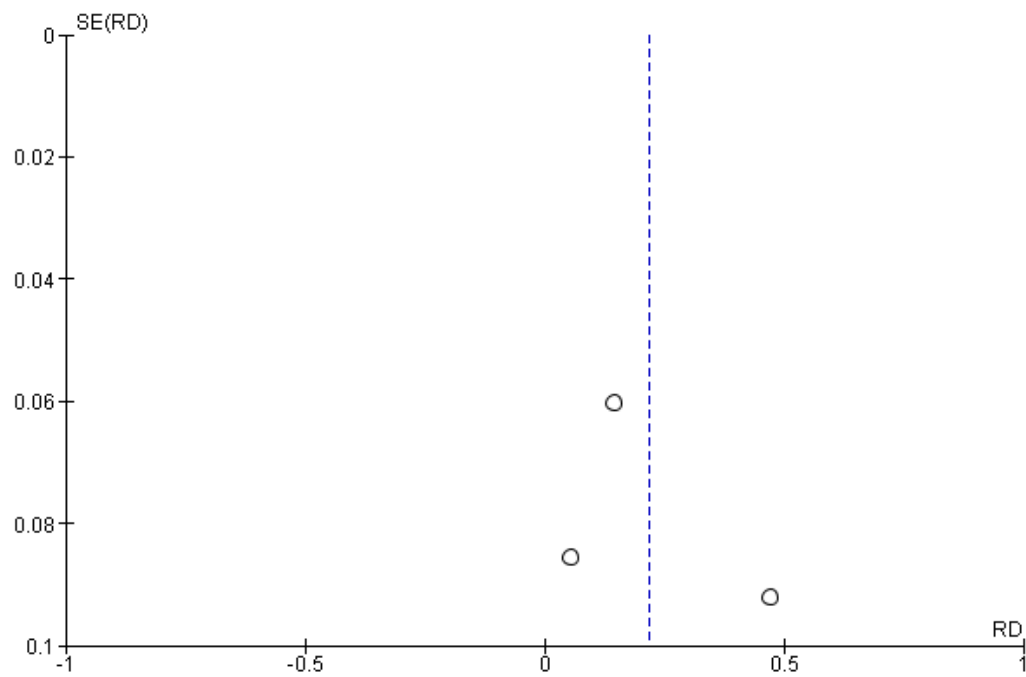

### Smoking cessation

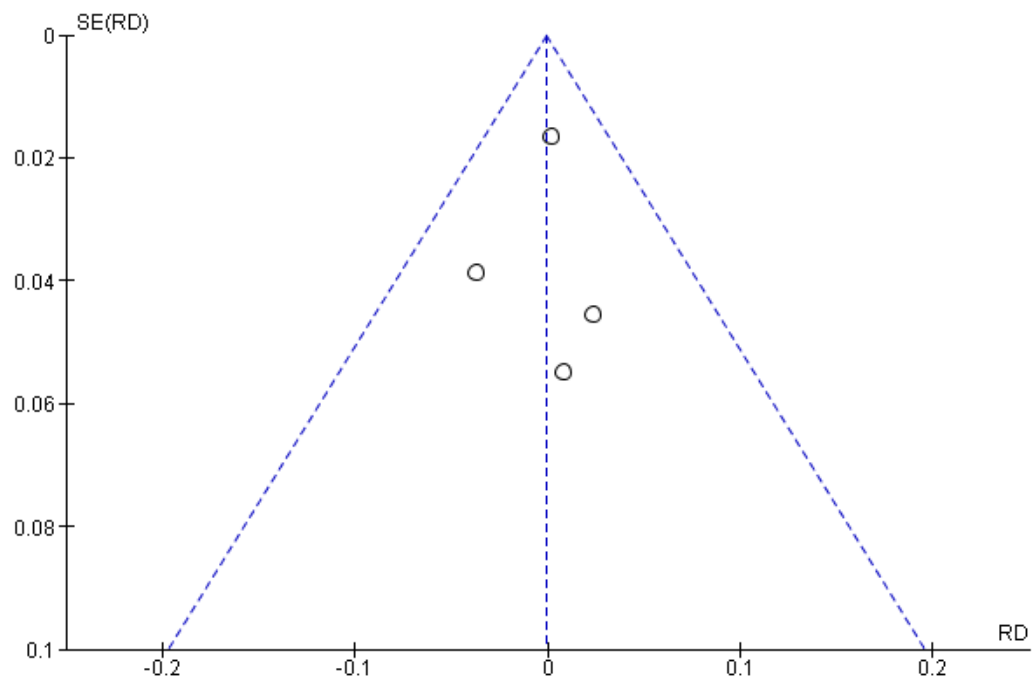

### Mortality

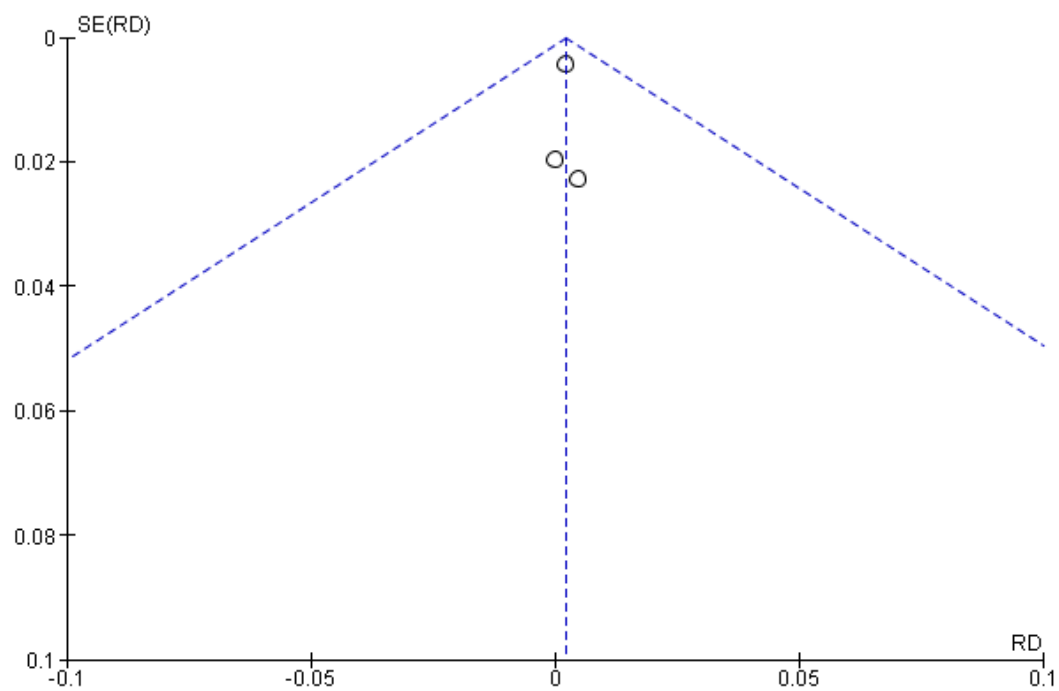

### Rehospitalization all causes

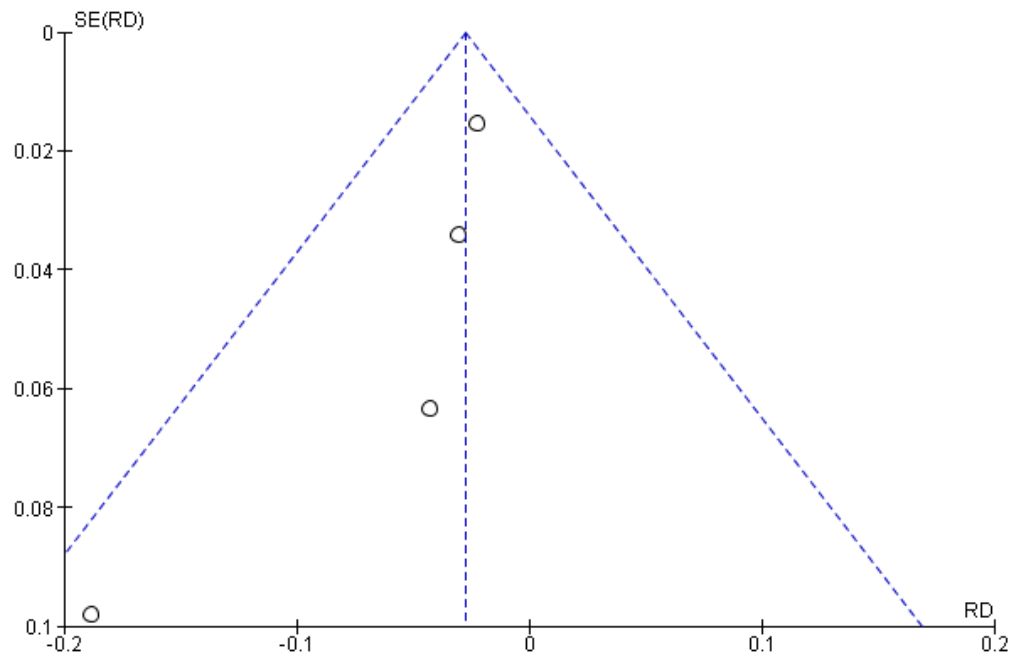

### Rehospitalization cardiovascular causes

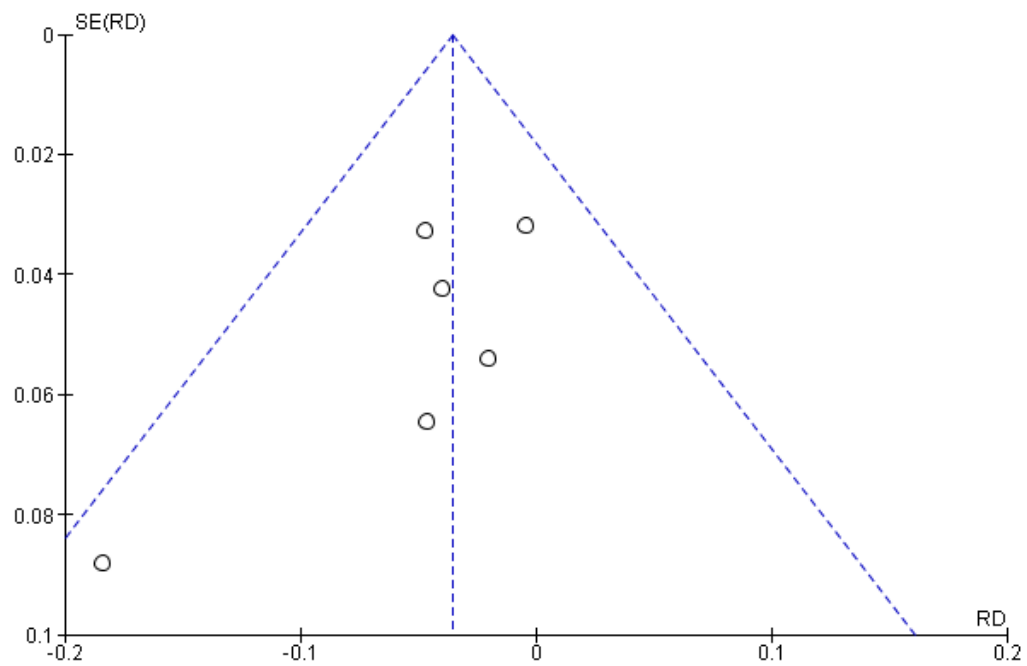

Supplement: mhealth_v10i12e39593_app3.pdf [file mhealth_v10i12e39593_app3.pdf]
