# Supplementary material for: Effectiveness of mHealth Interventions in the Control of Lifestyle and Cardiovascular Risk Factors in Patients After a Coronary Event: Systematic Review and Meta-analysis
Source: PubMed Central journal article supplement (PMC9758644; doi:10.2196/39593), 2022-12-02
Supplement: mhealth_v10i12e39593_app1.pdf [file mhealth_v10i12e39593_app1.pdf]

| <b>Supplementary table S1. Complete search strategy</b> |                                                                                                                                                                                                                                                     |
|---------------------------------------------------------|-----------------------------------------------------------------------------------------------------------------------------------------------------------------------------------------------------------------------------------------------------|
| <b>#1</b>                                               | ((coronary [Title/Abstract]) OR (infarction [Title/Abstract]) OR ("acute coronary syndrome"[Title/Abstract]) OR ("coronary disease" [Title/Abstract]) OR (cardiac [Title/Abstract]))                                                                |
| <b>#2</b>                                               | mhealth [Title/Abstract]) OR (m-health [Title/Abstract])) OR (mobile [Title/Abstract])) OR (smartphone [Title/Abstract])) OR (mobile applications [Title/Abstract]) OR (app [Title/Abstract]))                                                      |
| <b>#3</b>                                               | "Randomized controlled trial" [Title/Abstract]) OR ("controlled trial" [Title/Abstract])) OR ("randomized clinical trial" [Title/Abstract])) OR ("randomised controlled trial" [Title/Abstract])) OR ("randomised clinical trial" [Title/Abstract]) |
|                                                         | Search (#1 AND #2 AND #3)                                                                                                                                                                                                                           |
