# Supplementary material for: Effectiveness of mHealth Interventions in the Control of Lifestyle and Cardiovascular Risk Factors in Patients After a Coronary Event: Systematic Review and Meta-analysis
Source: PubMed Central journal article supplement (PMC9758644; doi:10.2196/39593), 2022-12-02
Supplement: mhealth_v10i12e39593_app2.pdf [file mhealth_v10i12e39593_app2.pdf]

**Supplementary Table S2.** GRADE Summary of Findings: Mhealth vs. Standard care

| Outcomes (studies)                          | Patients (I/C)    | Anticipated absolute effects (95% CI)          | Relative effect (95%CI)   | Quality of evidence | Rated down reasons |
|---------------------------------------------|-------------------|------------------------------------------------|---------------------------|---------------------|--------------------|
| Total cholesterol (9)                       | 1211<br>614/597   | MD 2.52 lower (8.90 lower to 3.86 higher)      |                           | ⊕○○○<br>Very low    | a, b, c            |
| LDL cholesterol (9)                         | 1207<br>612/595   | MD 3.07 lower (9.50 lower to 3.37 higher)      |                           | ⊕○○○<br>Very low    | a, b, c            |
| HDL cholesterol (7)                         | 943<br>457/486    | MD 0.60 higher (0.33 lower to 1.52 higher)     |                           | ⊕⊕⊕○<br>Moderate    | a                  |
| Triglycerides (6)                           | 889<br>439/450    | MD 1.65 lower (10.55 lower to 7.25 higher)     |                           | ⊕⊕⊕○<br>Moderate    | a, c               |
| Systolic Blood Pressure (13)                | 2469<br>1249/1220 | MD 0.02 lower (2.39 lower to 2.35 higher)      |                           | ⊕⊕⊕⊕<br>High        |                    |
| Diastolic Blood Pressure (12)               | 2187<br>1103/1084 | MD 0.62 higher (0.71 lower to 1.95 higher)     |                           | ⊕⊕○○<br>Low         | a, b               |
| Body Mass Index (9)                         | 1986<br>983/1003  | MD 0.02 higher (1.01 lower to 1.05 higher)     |                           | ⊕⊕⊕⊕<br>High        |                    |
| Waist circumference (3)                     | 368<br>182/186    | MD 1.10 lower (4.22 lower to 2.03 higher)      |                           | ⊕⊕○○<br>Low         | a, c               |
| HbA1c (3)                                   | 382<br>189/193    | MD 0.16 lower (0.41 lower to 0.10 higher)      |                           | ⊕○○○<br>Very low    | a, b, c            |
| Glucose (3)                                 | 315<br>145/170    | MD 2.44 lower (10.21 lower to 5.34 higher)     |                           | ⊕⊕○○<br>Low         | a, c               |
| Heart rate (3)                              | 494<br>236/258    | MD 2.87 lower (6.33 lower to 0.59 higher)      |                           | ⊕⊕○○<br>Low         | a, c               |
| Smoking cessation (4)                       | 1555<br>773/782   |                                                | RD - 0.00 (-0.03 to 0.03) | ⊕⊕⊕⊕<br>High        |                    |
| 6 minutes walk test (4)                     | 1339<br>669/670   | MD 21.64 higher (12.72 higher to 30.55 higher) |                           | ⊕⊕⊕○<br>Moderate    | a, c               |
| Vo2 peak (8)                                | 1512<br>742/770   | MD 0.95 higher (0.40 lower to 2.29 higher)     |                           | ⊕⊕○○<br>Low         | a, b               |
| Physical activity (4)                       | 369<br>189/180    | SMD 0.42 higher (0.04 higher to 0.81 higher)   |                           | ⊕⊕○○<br>Low         | a, b, c            |
| Quality of life. General (9)                | 1751<br>867/884   | SMD 0.11 higher (0.04 lower to 0.26 higher)    |                           | ⊕⊕⊕○<br>Moderate    | a                  |
| Quality of life. Physical dimension (5)     | 620<br>307/313    | SMD 0.26 higher (0.09 higher to 0.44 higher)   |                           | ⊕⊕⊕⊕<br>High        |                    |
| Quality of life. Mental dimension (5)       | 620<br>307/313    | SMD 0.27 higher (0.06 higher to 0.47 higher)   |                           | ⊕⊕⊕⊕<br>High        |                    |
| Anxiety (4)                                 | 612<br>295/317    | SMD 0.08 lower (0.24 lower to 0.07 higher)     |                           | ⊕⊕○○<br>Low         | a, c               |
| Depression (5)                              | 679<br>328/351    | SMD 0.02 lower (0.23 lower to 0.19 higher)     |                           | ⊕⊕⊕○<br>Moderate    | a, c               |
| Adherence to medications (3)                | 507<br>278/229    |                                                | RD 0.22 (-0.00 to 0.44)   | ⊕○○○<br>Very low    | a, b, c            |
| Mortality (3)                               | 2042<br>1021/1021 |                                                | RD 0.00 (-0.01 to 0.01)   | ⊕⊕⊕⊕<br>High        |                    |
| Rehospitalization all causes (4)            | 2081<br>1041/1040 |                                                | RD -0.03 (-0.05 to -0.00) | ⊕⊕⊕⊕<br>High        |                    |
| Rehospitalization cardiovascular causes (6) | 1531<br>769/762   |                                                | RD -0.04 (-0.07 to -0.00) | ⊕⊕⊕○<br>Moderate    | a                  |

<sup>a</sup> Downgraded because of risks of biases (such as attrition bias, blinding, and other bias).

<sup>b</sup> Downgraded because of inconsistency

<sup>c</sup> Downgraded because of imprecision
