# Supplementary material for: Effectiveness of mHealth Interventions in the Control of Lifestyle and Cardiovascular Risk Factors in Patients After a Coronary Event: Systematic Review and Meta-analysis
Source: PubMed Central journal article supplement (PMC9758644; doi:10.2196/39593), 2022-12-02
Supplement: mhealth_v10i12e39593_app4.pdf [file mhealth_v10i12e39593_app4.pdf]

**Table 1.** Characteristics of included studies.

| <b>Study</b>              | <b>Design/ Participants</b>                                                                                                                                              | <b>Inclusion criteria</b>                                                | <b>Intervention and follow-up</b>                                                                                                                                                                                                                                                                            | <b>Outcomes</b>                                                                                                                                                                                                                                                   |
|---------------------------|--------------------------------------------------------------------------------------------------------------------------------------------------------------------------|--------------------------------------------------------------------------|--------------------------------------------------------------------------------------------------------------------------------------------------------------------------------------------------------------------------------------------------------------------------------------------------------------|-------------------------------------------------------------------------------------------------------------------------------------------------------------------------------------------------------------------------------------------------------------------|
| <b>Skobel et al. (17)</b> | - Multicenter<br><b>n= 118</b><br>Age 58 ± 10<br><b>CG n=63</b><br>Age 58 (52,67)<br>Lost of follow-up: 21<br><b>IG n= 55</b><br>Age 60 (50,65)<br>Lost of follow-up: 36 | - CAD (AMI or PCI)<br>- EF ≥ 30%<br>- Willing to exercise                | <b>Intervention:</b> 6 months<br><b>Follow-up:</b> 6 months<br><b>Website:</b> Smartphone-guided training system with sensor that monitors respiratory rate and electrocardiogram. The medical team provided feedback and adjusted prescriptions.<br><b>Professional:</b> Sport physicians                   | <b>Primary</b><br>- VO2peak (ml/kg/min)<br><b>Secondary</b><br>- HDL-c, cLDL-c, total cholesterol<br>- HbA1c, glucose<br>- BMI<br>- Quality of life (EQ-5D).<br>- Anxiety and Depression (HADS-anxiety, HADS-depression)                                          |
| <b>Choi et al. (18)</b>   | - Unicenter<br><b>n= 100</b><br><b>CG n= 49</b><br>Age 56.6± 1.7<br>Lost of follow-up: 5<br><b>IG n=51</b><br>Age 57.7 ± 1.8<br>Lost of follow-up: 7                     | -CVD (atherosclerotic, MI, previous PCI, other)<br>>18 years             | <b>Intervention:</b> 3 months<br><b>Follow-up:</b> 1, 3 and 6 months<br><b>Smartphone application:</b> Personalised application aimed at reinforcing the Mediterranean diet, with weekly challenges to encourage dietary modification, messaging service.<br><b>Professional:</b> Dietitian and cardiologist | <b>Primary</b><br>- Body weight<br>- Mediterranean diet compliance and satisfaction score (Mediterranean diet score, diet satisfaction score)<br><b>Secondary</b><br>- SBP, DBP<br>- BMI,<br>- LDL-c, HDL-c, total cholesterol, triglycerides<br>- HbA1c<br>- CRP |
| <b>Widmer et al. (19)</b> | - Unicenter<br><b>n=80</b><br><b>CG n=40</b><br>Age 63,6±10,9<br>Lost of follow-up: 6                                                                                    | - ACS (with PCI)<br>> 18 years<br>-Without problem for physical activity | <b>Intervention:</b> 3 months<br><b>Follow-up:</b> 3 and 6 months<br><b>Smartphone application:</b> Recording of outcomes in the app for periodic checks, online messaging service.                                                                                                                          | <b>Primary</b><br>-MACE<br><b>Secondary</b><br>- Body weight, BMI<br>- SBP, DBP                                                                                                                                                                                   |

**IG n=40**  
Age 62,5±10,7  
Lost of follow-up: 3

**Professional:** Cardiologist and internist doctor

- Waist circumference
- HR
- Glucose/HbA1c
- LDL-c, HDL-c, total cholesterol, triglycerides
- Physical activity (min exe/week)
- Diet (food score)
- Quality of life(Darmouth QOL)
- Stress (stress score)
- Acceptability and usability of the app (questionnaire)

**Fang et al. (20)**

- Multicenter  
**n= 80**  
**CG n=40**  
Age 61.41 ± 10.169  
Lost of follow-up: 5  
**IG n=40**  
Age 60.24 ± 9.351  
Lost of follow-up: 6

- Low-risk patients after PCI  
-Living with at least one other person

**Intervention:** 1.5 months  
**Follow-up:** 1.5 months  
**Smartphone application and website:** Cardiac telerehabilitation at home with real-time monitoring and rapid feedback between the patients and clinicians.  
**Professional:** Physiotherapist and Doctors

**Primary**

- Exercise capacity (6MWT)
- SBP, DBP
- Anxiety and depression (CDS Score)
- Quality of life (SF-36)
- Nicotine dependence (FTND score)

**Frederix et al. (21)**

- Multicenter  
**n=140**  
**CG n=70**  
Age 61±8  
Lost of follow-up: 11  
**IG n=70**  
Age 61±9  
Lost of follow-up: 10

-CAD (with PCI or coronary bypass) / CHF  
>18 and <80 years

**Intervention:** 6 months  
**Follow-up:** 12 and 24 months  
**Website:** Training prescriptions with specific individualised exercises. Recording of the physical activity carried out. Dietary telecoaching with a module for AHT, diabetes mellitus, obesity.  
**Professional:** Cardiologists

**Primary**

- VO2peak (ml/kg/min)

**Secondary**

- Self-reported physical activity (IPAQ)
- Quality of life (HeartQoL),
- Cost-effectiveness
- HbA1c, glucose
- LDL-c, HDL-c, total cholesterol, triglycerides
- Cardiovascular readmissions

|                                    |                                                                                                                                                                            |                                                                                                                                                                                             |                                                                                                                                                                                                                                                                                                                                                   |                                                                                                                                                                                                                                                                                                                                                                                                                                                                                                                                          |
|------------------------------------|----------------------------------------------------------------------------------------------------------------------------------------------------------------------------|---------------------------------------------------------------------------------------------------------------------------------------------------------------------------------------------|---------------------------------------------------------------------------------------------------------------------------------------------------------------------------------------------------------------------------------------------------------------------------------------------------------------------------------------------------|------------------------------------------------------------------------------------------------------------------------------------------------------------------------------------------------------------------------------------------------------------------------------------------------------------------------------------------------------------------------------------------------------------------------------------------------------------------------------------------------------------------------------------------|
| <p><b>Maddison et al. (22)</b></p> | <p>- Multicenter<br/> <b>n=171</b><br/> <b>CG n=85</b><br/> Age 59,0±9,5<br/> Lost of follow-up: 8<br/> <b>IG n=86</b><br/> Age 61,4±8,9<br/> Lost of follow-up: 10</p>    | <p>- CAD (angina, AMI)<br/> -Revascularization, including angioplasty, stent or coronary artery bypass graft within the previous 3–24 months<br/> &gt;18 years<br/> - Clinically stable</p> | <p><b>Intervention:</b> 6 months<br/> <b>Follow-up:</b> 6 months<br/> <b>Website + sms:</b> Regular exercise prescription, behaviour change strategies and technical support with additional information through a website with new weekly content.<br/> <b>Professional:</b> CR nurses, doctor and physiotherapist</p>                           | <p><b>Primary</b><br/> - VO<sub>2</sub>peak (ml/kg/min)<br/> <b>Secondary</b><br/> -Physical activity (IPAQ-LF).<br/> -Self-efficacy (task and barrier scale 0-100)<br/> -Quality of life (SF36 v.2 y EQ-5D)</p>                                                                                                                                                                                                                                                                                                                         |
| <p><b>Dorje et al. (23)</b></p>    | <p>- Multicenter<br/> <b>n=312</b><br/> <b>CG n=156</b><br/> Age 61,9±8,7<br/> Lost of follow-up: 25<br/> <b>IG n=156</b><br/> Age 59,1±9,4<br/> Lost of follow-up: 22</p> | <p>- CAD (with PCI)<br/> ≥18 years</p>                                                                                                                                                      | <p><b>Intervention:</b> 2 months + 4 months<br/> <b>Follow-up:</b> 2, 6 and 12 months<br/> <b>Website:</b> Monitoring physical activity with feedback and goal setting; interactive educational modules with avatars; remote blood pressure monitoring and strategies to improve medication adherence.<br/> <b>Professional:</b> Cardiologist</p> | <p><b>Primary</b><br/> - Exercise capacity (6MWT)<br/> <b>Secondary</b><br/> - Knowledge of coronary heart disease (knowledge of CHD total score)<br/> - BMI<br/> - Resting HR<br/> - SBP<br/> - LDL-c, HDL-c, total cholesterol and triglycerides<br/> - Smoking status<br/> - Waist circumference<br/> - Quality of life (SF-12)<br/> - Anxiety (GAD-7 total score)<br/> - Depression (PHQ-9 total score)<br/> -Cardiac medication adherence (self-reported according to records in the platform)<br/> - Utility and acceptability</p> |
| <p><b>Hong et al. (24)</b></p>     | <p>- Multicenter<br/> <b>n= 60</b></p>                                                                                                                                     | <p>-CAD (previous MI, coronary artery bypass grafting, PCI or stenosis of</p>                                                                                                               | <p><b>Intervention:</b> 3 months<br/> <b>Follow-up:</b> 3 and 6 months</p>                                                                                                                                                                                                                                                                        | <p><b>Primary</b><br/> -Self-care and quality of life (PIH scale; WHOQOL-</p>                                                                                                                                                                                                                                                                                                                                                                                                                                                            |

|                               |                                                                                                                                                            |                                                                                                                                                  |                                                                                                                                                                                                                                                                                                                                                                   |                                                                                                                                                                                                                                                                                                  |
|-------------------------------|------------------------------------------------------------------------------------------------------------------------------------------------------------|--------------------------------------------------------------------------------------------------------------------------------------------------|-------------------------------------------------------------------------------------------------------------------------------------------------------------------------------------------------------------------------------------------------------------------------------------------------------------------------------------------------------------------|--------------------------------------------------------------------------------------------------------------------------------------------------------------------------------------------------------------------------------------------------------------------------------------------------|
|                               | 41-60 years (n = 24,40 %)<br>61 -70 years (n = 27,<br>45 %)<br><b>CG n= 30</b><br><b>IG n= 30</b>                                                          | 50% or more in at least one major<br>epicardial vessel).<br>> 20 years                                                                           | <b>Web-based app:</b> Focused on blood<br>pressure monitoring, self-monitoring<br>behaviour and quality of life. The app has<br>alarm and reminder systems for patients<br>and graphs of their records.<br><b>Professional:</b> Nurses                                                                                                                            | BREF)<br>- SBP, DBP                                                                                                                                                                                                                                                                              |
| <b>Maddison et al. (25)</b>   | - Multicenter<br><b>n= 162</b><br><b>CG n=80</b><br>Age 61,5 ± 12,2<br>Lost of follow-up: 11<br><b>IG n=82</b><br>Age 61,0 ± 13,2<br>Lost of follow-up: 17 | - CAD within the last 6 months<br>(atherosclerosis, angina pectoris,<br>AMI, coronary revascularisation)<br>≥18 year                             | <b>Intervention:</b> 3 months<br><b>Follow-up:</b> 3 and 6 months<br><b>Website + smartphone application</b> of<br>personalised telerehabilitation, with<br>individualised weekly exercise<br>prescription, monitoring and training,<br>behaviour change strategies to promote<br>exercise and regular physical activity.<br><b>Professional:</b> Physiotherapist | <b>Primary</b><br>- VO2peak (ml/kg/min)<br><b>Secondary</b><br>- HDL-c, LDL-c, total cholesterol and triglycerides<br>- Glucose<br>- Body weight, BMI<br>- Waist/hip circumference<br>- SBP, DBP<br>- Physical activity (min/day)<br>- Motivation to exercise<br>-Quality of life (EQ- 5D index) |
| <b>Park et al. (26)</b>       | - Multicenter<br><b>n= 60</b><br><b>CG n=28</b><br>Age 66.8± 8.7<br>Lost of follow-up: 3<br><b>IG n=32</b><br>Age 66.7 ± 8.6<br>Lost of follow-up: 6       | - History of CVD: ischaemic heart<br>disease (PCI, bypass, angina and<br>AMI), valvular heart disease,<br>structural heart disease<br>≥ 18 years | <b>Intervention:</b> 2 months<br><b>Follow-up:</b> 2 months<br><b>Smartphone application</b> (Movn): To<br>record exercise, weight, BP, HR,<br>medication use. With motivational and<br>educational messages related to CVD<br>management.                                                                                                                        | <b>Primary</b><br>- Exercise capacity (6MWT)<br>- Steps/day<br><b>Secondary</b><br>-Depression (PHQ-9) and self-efficacy to maintain<br>exercise (EXSE)                                                                                                                                          |
| <b>Piotrowicz et al. (27)</b> | - Multicenter<br><b>n= 850</b>                                                                                                                             | -HF (ischaemic and non-ischaemic),<br>MI, angioplasty, bypass, valve                                                                             | <b>Intervention:</b> 9 weeks<br><b>Follow-up:</b> 9 weeks, 14 and 26 months                                                                                                                                                                                                                                                                                       | <b>Primary</b><br>- % of days alive and out of the hospital                                                                                                                                                                                                                                      |

|                          |                                                                                                                                                                         |                                                                                                                                                                                                              |                                                                                                                                                                                                                                                                                                                                                    |                                                                                                                                                                                                                                                      |
|--------------------------|-------------------------------------------------------------------------------------------------------------------------------------------------------------------------|--------------------------------------------------------------------------------------------------------------------------------------------------------------------------------------------------------------|----------------------------------------------------------------------------------------------------------------------------------------------------------------------------------------------------------------------------------------------------------------------------------------------------------------------------------------------------|------------------------------------------------------------------------------------------------------------------------------------------------------------------------------------------------------------------------------------------------------|
|                          | <p><b>CG n=425</b><br/>Age 62.2± 10.2<br/>Lost of follow-up: 30</p> <p><b>IG n=425</b><br/>Age 62.6 ± 10.8<br/>Lost of follow-up: 12</p>                                | <p>surgery.</p> <ul style="list-style-type: none"> <li>- LVEF ≤ 40%</li> <li>- Hospitalised</li> <li>- Clinically stable</li> <li>- No contraindications to undergo CPET</li> </ul>                          | <p><b>Website:</b> Storage of patient data uploaded via mobile phone, monitoring with: a special remote device for supervised exercise training with tele-EKG, a blood pressure device and a body weight scale. Telephone contact for psychological support.</p> <p><b>Professional:</b> Doctors, physiotherapists, nurses and a psychologist.</p> | <p><b>Secondary</b></p> <ul style="list-style-type: none"> <li>- MACE</li> <li>- VO2peak (ml/kg/min)</li> <li>- Quality of life (SF-36)</li> <li>- Exercise capacity (6MWT)</li> </ul>                                                               |
| <b>Santo et al. (28)</b> | <p>- Unicenter<br/><b>n= 163</b><br/><b>CG n= 56</b><br/>Age 56,8 ±8,64<br/>Lost of follow-up: 5</p> <p><b>IG n= 107</b><br/>Age 58,4±9,04<br/>Lost of follow-up: 6</p> | <p>-ACS (MI, unstable or stable angina, PCI or &gt;50% stenosis in at least one major vessel)<br/>&gt;18 years</p>                                                                                           | <p><b>Intervention:</b> 3 months<br/><b>Follow-up:</b> 3 months<br/><b>Smartphone application:</b> Interactive and customisable features, daily medication reminders, which can be postponed, rescheduled and/or marked as a 'taken' or 'missed' dose.<br/><b>Professional:</b> Doctors</p>                                                        | <p><b>Primary</b><br/>-Adherence to treatment (MMAS-8)</p> <p><b>Secondary</b><br/>-SBP, DBP<br/>- LDL-c<br/>- Number of missed doses in the last 7 days<br/>- Medication knowledge<br/>-Acceptability and usefulness of the App (questionnaire)</p> |
| <b>Snoek et al. (29)</b> | <p>- Unicenter<br/><b>n= 122</b><br/><b>CG n=61</b><br/>Age 59.0 ±10.7<br/>Lost of follow-up: 1</p> <p><b>IG n=61</b><br/>Age 60.0 ±8.4<br/>Lost of follow-up: 3</p>    | <p>- Have a minimum attendance of 80% in CR and at least one of the following indications for CR: ACS,PCI or coronary artery bypass grafting within three months prior to the start of the CR programme.</p> | <p><b>Intervention:</b> 6 months<br/><b>Follow-up:</b> 12 months<br/><b>Website:</b> Individualised with physical training records, training history on mobile phone. Telephone contact using motivational interviewing to motivate and stimulate the patient.<br/><b>Professional:</b> Nurse</p>                                                  | <p><b>Primary</b><br/>- VO2peak (ml/kg/min), FC max</p> <p><b>Secondary</b><br/>- Body weight, BMI<br/>- Waist circumference<br/>- LDL-c, total cholesterol<br/>- Quality of life (Qol, PHQ-9)<br/>- Anxiety and depression (HADS)<br/>- MACE</p>    |

|                                 |                                                                                                                                                                                      |                                                                                                                         |                                                                                                                                                                                                                                                                                                                   |                                                                                                                                                                                                                                                                                                                                                                                                                         |
|---------------------------------|--------------------------------------------------------------------------------------------------------------------------------------------------------------------------------------|-------------------------------------------------------------------------------------------------------------------------|-------------------------------------------------------------------------------------------------------------------------------------------------------------------------------------------------------------------------------------------------------------------------------------------------------------------|-------------------------------------------------------------------------------------------------------------------------------------------------------------------------------------------------------------------------------------------------------------------------------------------------------------------------------------------------------------------------------------------------------------------------|
| <p><b>Yu et al. (30)</b></p>    | <p>- Multicenter<br/> <b>n= 1000</b><br/> <b>CG n= 499</b><br/> Age 57.1± 9.20<br/> Lost of follow-up: 10<br/> <b>IG n= 501</b><br/> Age 57.41 ± 8.99<br/> Lost of follow-up: 16</p> | <p>- Coronary artery bypass<br/> &gt;18 years<br/> -Have preventive medication prescribed within 2 weeks of surgery</p> | <p><b>Intervention:</b> 6 months<br/> <b>Follow-up:</b> 3 and 6 months<br/> <b>Smartphone application:</b> With medication records and reminders, in-app messaging service.<br/> <b>Professional:</b> Nurses</p>                                                                                                  | <p><b>Primary</b><br/> - Medication adherence (MMAS-8)<br/> <b>Secondary</b><br/> - MACE<br/> - SBP, DBP<br/> - BMI<br/> - Smoking</p>                                                                                                                                                                                                                                                                                  |
| <p><b>Yudi et al. (31)</b></p>  | <p>- Multicenter<br/> <b>n= 206</b><br/> <b>CG n=103</b><br/> Age 56.2 ± 10.2<br/> Lost of follow-up: 18<br/> <b>IG n= 103</b><br/> Age 56.8 ± 9.9<br/> Lost of follow-up: 17</p>    | <p>-ACS (coronary artery stenosis &gt;50%), or PCI<br/> ≥18 years</p>                                                   | <p><b>Intervention:</b> 2 months<br/> <b>Follow-up:</b> 2 months<br/> <b>Smartphone application:</b> With an exercise prescription platform, dynamic CVRF monitoring. Tracking and evaluation of dietary data. Records of prescribed medication within the app. Messaging service with personalised messages.</p> | <p><b>Primary</b><br/> - Exercise capacity (6MWT)<br/> <b>Secondary</b><br/> - CR adherence and completion<br/> - LDL-c, HDL-c, total cholesterol and triglycerides<br/> - HbA1c<br/> - SBP, DBP<br/> - BMI, waist circumference<br/> - Smoking<br/> -MACE and hospital readmissions (after 2 months)<br/> - Depression and anxiety (CDS, HADS)<br/> - Quality of life (EQ-5D, SF-36).<br/> - Return to work (days)</p> |
| <p><b>Lunde et al. (32)</b></p> | <p>- Multicenter<br/> <b>n=113</b><br/> <b>CG n=56</b><br/> Age 58,4±8,2<br/> Lost of follow-up: 0<br/> <b>IG n=57</b><br/> Age 59,5±9,1</p>                                         | <p>- ACS, CAD<br/> ≥40 years<br/> - Completing a CR programme</p>                                                       | <p><b>Intervention:</b> 12 months<br/> <b>Follow-up:</b> 12 months<br/> <b>Smartphone application:</b> Automatic reminders, task evaluations, weekly goal achievement, short personalised and individualised motivational feedback.<br/> <b>Professional:</b> Physiotherapist specialising</p>                    | <p><b>Primary</b><br/> -VO2peak (ml/kg/min)<br/> <b>Secondary</b><br/> -Exercise performance: Time to exhaustion (sec); Max incline (%) and Max speed (km/h)<br/> -Body weight<br/> -SBP, DBP</p>                                                                                                                                                                                                                       |

|                             |                                                                                                                                                        |                                                                                                                                  |                                                                                                                                                                                                                                                                                                                                                                                      |                                                                                                                                                                                                                                                          |
|-----------------------------|--------------------------------------------------------------------------------------------------------------------------------------------------------|----------------------------------------------------------------------------------------------------------------------------------|--------------------------------------------------------------------------------------------------------------------------------------------------------------------------------------------------------------------------------------------------------------------------------------------------------------------------------------------------------------------------------------|----------------------------------------------------------------------------------------------------------------------------------------------------------------------------------------------------------------------------------------------------------|
|                             | Lost of follow-up: 2                                                                                                                                   |                                                                                                                                  | in cardiovascular and pulmonary physiotherapy                                                                                                                                                                                                                                                                                                                                        | - LDL-c, HDL-c, total cholesterol and triglycerides<br>-Exercise habit (exercise sessions (30 min) /week, per year)<br>-Quality of life (HRQL, EQ-5D VAS)<br>-Weekly self-perceived goal achievement (Likert scale 0-100)                                |
| <b>Su et al. (33)</b>       | - Unicenter<br><b>n= 146</b><br><b>CG n=73</b><br>Age 56.03±7.02<br>Lost of follow-up: 15<br><b>IG n=73</b><br>Age 55.53 ±7.30<br>Lost of follow-up: 7 | - CHD<br>>18 years<br>-No contraindications for physical activity                                                                | <b>Intervention:</b> 3 months<br><b>Follow-up:</b> 1.5 and 3 months<br><b>Web-based app:</b> Composed of three platforms: a goal-achievement interface, an experiential learning interface and a health dialogue forum. Participants uploaded goal achievement data on a weekly or daily basis with graphical visualisation and motivational feedback.<br><b>Professional:</b> Nurse | <b>Primary</b><br>- Physical activity (IPAQ, steps/day)<br>- Smoking<br><b>Secondary</b><br>- Waist circumference, BMI<br>- SBP, DBP<br>- Cardiac self-efficacy (CSES)<br>- Quality of life (MacNew questionnaire)<br>- Anxiety and depression (DASS-21) |
| <b>Barnason et al. (34)</b> | - Multicenter<br><b>n=50</b><br>Age 63 ± 9.3<br><b>CG n=25</b><br>Lost of follow-up: 4<br><b>IG n=25</b><br>Lost of follow-up: 3                       | - Coronary artery bypass surgery or PCI<br>- Overweight or obese<br>-Participating in a rural CR programme                       | <b>Intervention:</b> 3 months<br><b>Follow-up:</b> 4 and 6 months<br><b>Mobile device</b> (Viterion®): Which included six modules with 36 telehealth sessions addressing calorie goals and dietary portion guidelines + telephone coaching.<br><b>Professional:</b> Nurse                                                                                                            | <b>Primary</b><br>- BMI<br><b>Secondary</b><br>- Physical activity, patient motivation, self-efficacy (CESEI y HHESE scale)                                                                                                                              |
| <b>Duscha et al. (35)</b>   | - Multicenter<br><b>n = 32</b><br><b>CG n=9</b><br>Age 66,5 ± 7,2                                                                                      | -CVD (MI with PCI or with coronary bypass / coronary bypass without MI/ PCI without MI/ coronary bypass valve repair/ HF, stable | <b>Intervention:</b> 3 months<br><b>Follow-up:</b> 3 months<br>Smartphone application: Using physical activity trackers and health counselling,                                                                                                                                                                                                                                      | <b>Primary</b><br>- VO2peak (ml/kg/min)<br>- Steps/day<br>- Physical activity (min/week)                                                                                                                                                                 |

|                             |                                                                                                                                                                                 |                                                                                                                   |                                                                                                                                                                                                                                                                                                                                 |                                                                                                                                                                                                                                                                         |
|-----------------------------|---------------------------------------------------------------------------------------------------------------------------------------------------------------------------------|-------------------------------------------------------------------------------------------------------------------|---------------------------------------------------------------------------------------------------------------------------------------------------------------------------------------------------------------------------------------------------------------------------------------------------------------------------------|-------------------------------------------------------------------------------------------------------------------------------------------------------------------------------------------------------------------------------------------------------------------------|
|                             | <p>Lost of follow-up: 2<br/> <b>IG n=21</b><br/> Age 59,9±8,1<br/> Lost of follow-up: 5</p>                                                                                     | <p>angina)<br/> ≥18 year<br/> - Completion of 36 CR sessions<br/> - Clinical stability<br/> - Complete a CPET</p> | <p>with personalised exercise prescription.<br/> <b>Professional:</b> Nutritionists, exercise physiologists, nurses and health educators.</p>                                                                                                                                                                                   |                                                                                                                                                                                                                                                                         |
| <b>Johnston et al. (36)</b> | <p>- Multicenter<br/> <b>n= 174</b><br/> <b>CG n= 83</b><br/> Age 58,4<br/> Lost of follow-up: 6<br/> <b>IG n=91</b><br/> Age 56,8<br/> Lost of follow-up: 6</p>                | <p>- MI<br/> &gt;18 years<br/> -With treatment initiated in-hospital with ticagrelor 90 mg 2/day one year</p>     | <p><b>Intervention:</b> 1 month<br/> <b>Follow-up:</b> 6 months<br/> <b>Web-based app:</b> Installed on the smartphone with an electronic diary focusing on medication adherence and secondary prevention education modules. Educational messages according to reported records.<br/> <b>Professional:</b> Doctor and Nurse</p> | <p><b>Primary</b><br/> Adherence to treatment (electronic diary) (MARS-5)<br/> <b>Secondary</b><br/> - BMI<br/> - SBP<br/> - LDL-c<br/> - Physical activity level (min/week)<br/> - App Usability (SUS)<br/> - Smoking cessation<br/> -Quality of life (EQ- 5D VAS)</p> |
| <b>Song et al. (37)</b>     | <p>- Multicenter<br/> <b>n= 106</b><br/> <b>CG n=53</b><br/> Age 54.83 ± 9.13<br/> Lost of follow-up: 5<br/> <b>IG n=53</b><br/> Age 54.17 ± 8.76<br/> Lost of follow-up: 5</p> | <p>- Stable CHD<br/> ≤ 75 years<br/> -Without physical or mental disorders affecting exercise</p>                 | <p><b>Intervention:</b> 6 months<br/> <b>Follow-up:</b> 6 months<br/> Remote <b>monitoring software</b> installed on <b>smartphones:</b> Rehabilitation with tele-monitored exercises. Weekly communication through text messaging and phone calls.<br/> <b>Professional:</b> Doctors</p>                                       | <p><b>Primary</b><br/> - VO2peak (ml/kg/min)<br/> <b>Secondary</b><br/> - Improved exercise tolerance (CPET)<br/> - HDL-c, LDL-c, triglycerides<br/> - Glucose<br/> - MACE</p>                                                                                          |
| <b>Treskes et al. (38)</b>  | <p>- Unicenter<br/> <b>n=200</b><br/> <b>CG n=100</b></p>                                                                                                                       | <p>- MI<br/> &gt; 18 years<br/> - BMI &lt;35 kg/m2</p>                                                            | <p><b>Intervention:</b> 12 months<br/> <b>Follow-up:</b> 1, 6 and 12 months<br/> <b>Smartphone application:</b> Daily recording</p>                                                                                                                                                                                             | <p><b>Primary</b><br/> - SBP and DBP control<br/> <b>Secondary</b></p>                                                                                                                                                                                                  |

Age 59,1 ± 30,3  
 Lost of follow-up: 8  
**IG n=100**  
 Age 60,1 ± 34,6  
 Lost of follow-up: 12

and review of variables, contact if BP is higher than recommended or arrhythmias. Management of 4 devices + Smartphone (BP monitor, pedometer, weighing scale and ECG device).  
**Professional:** Nurse specialised and cardiologist

-Patient's Satisfaction (Patient's Satisfaction Questionnaire)  
 - MACE (one year after MI)

**Garmendia et al. (39)** - Unicenter  
**n=90**  
**CG n=44**  
 Age 62±10  
 Lost of follow-up: 0  
**IG n=46**  
 Age 64±10  
 Lost of follow-up: 0

-ACS hospitalised (with and without ST elevation)  
 > 18 years

**Intervention:** 3 months  
**Follow-up:** 3 months  
**Smartphone application** (MyTherapy®): Where the medical team installs a list of prescribed medication with alarms as a reminder.  
**Professional:** Doctor

**Primary**  
 - Adherence to treatment (MMAS-8)

**ACS:** acute coronary syndrome; **AMI:** acute myocardial infarction; **BMI:** body mass index; **CAD:** coronary artery disease; **CDS:** Calgary Depression Scale; **CESEI:** Cardiac Exercise Self-Efficacy Instrument; **CG:** Control Group; **CHD:** coronary heart disease; **CHF:** chronic heart failure; **CSES:** Cardiac Self-efficacy Scale; **CR:** cardiac rehabilitation; **C-RP:** c-reactive protein; **CPET:** cardiopulmonary exercise test; **CVD:** cardiovascular disease; **CVRF:** cardiovascular risk factors; **DASS-21:** Depression Anxiety Stress Scale 21; **DBP:** diastolic blood pressure; **EKG:** electrocardiogram; **EQ-5D VAS:** European Quality of Life-5 Dimensions, visual analog scale; **EXSE:** Exercise Self-Efficacy Scale; **FTND:** Fagerström Test for Nicotine Dependence; **GAD-7:** Generalized Anxiety Disorder; **HADS:** Hospital Anxiety and Depression Scale; **HbA1c:** glycosylated hemoglobin; **HBP:** high blood pressure; **HDL-c:** high-density lipoprotein cholesterol; **HF:** heart failure; **HHESI:** Heart Healthy Eating Self-Efficacy; **HR:** heart rate; **HRQL:** Health-Related Quality of Life; **IG:** Intervention Group; **IPAQ:** International Physical Activity Questionnaire; **LDL-c:** low-density lipoprotein cholesterol; **LVEF:** left ventricular ejection fraction; **MACE:** major adverse cardiac events; **MacNew:** MacNew Heart Disease Health-related Quality of Life; **MARS-5:** Medication Adherence Report Scale; **MI:** myocardial infarction; **MMAS-8:** Morisky Medication Adherence Scale-8; **PCI:** percutaneous coronary intervention; **PHQ-9:** Patient Health Questionnaire; **PIH:** Partners in Health; **QoL:** Quality of Life; **SBP:** systolic blood pressure; **SF-12:** 12-item short form health survey; **SF-36:** 36-item health survey; **SUS:** system usability scale; **Vo2 peak:** Peak oxygen uptake; **WHOQoL-BREF:** World Health Organization Quality of Life; **6MWT:** six minutes walk test.
