# Supplementary material for: Effectiveness of mHealth Interventions in the Control of Lifestyle and Cardiovascular Risk Factors in Patients After a Coronary Event: Systematic Review and Meta-analysis
Source: PubMed Central journal article supplement (PMC9758644; doi:10.2196/39593), 2022-12-02

**Supplementary figures S2.** Forest plots for changes in systolic blood pressure, diastolic blood pressure, body mass index and waist circumference.

**Systolic blood pressure**

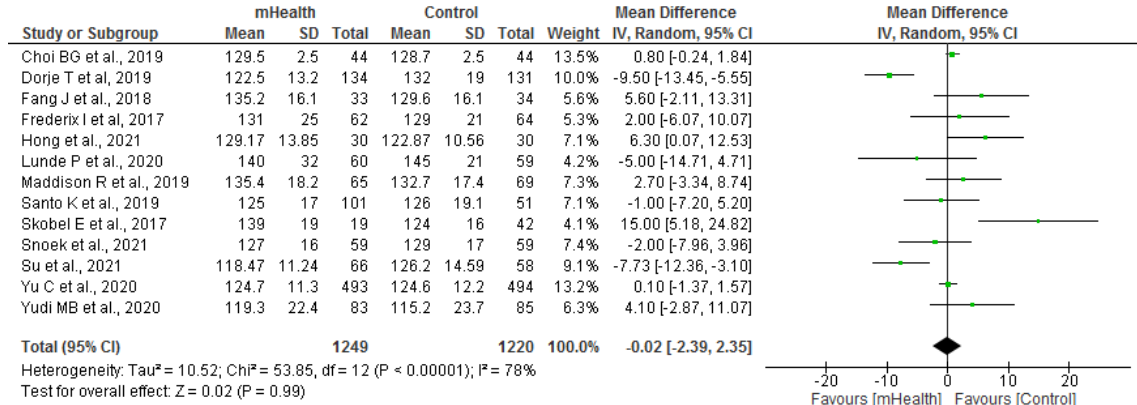

**Diastolic blood pressure**

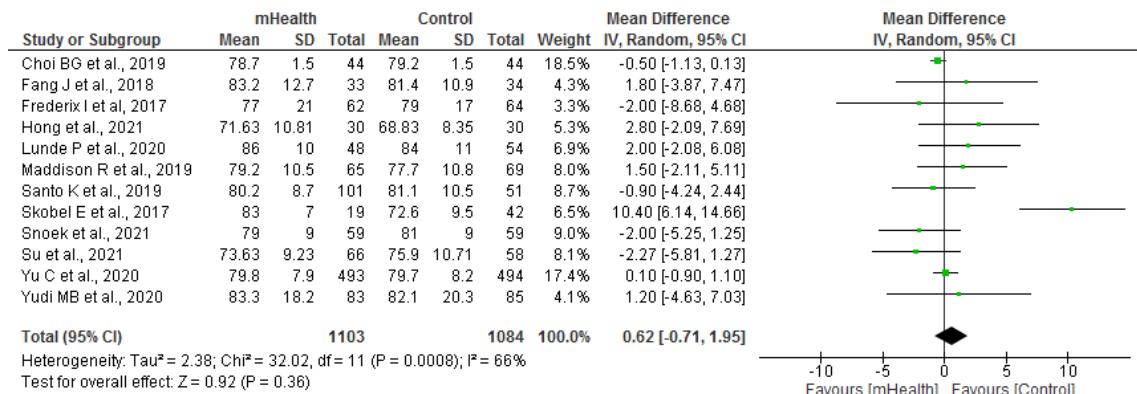

**Body mass index**

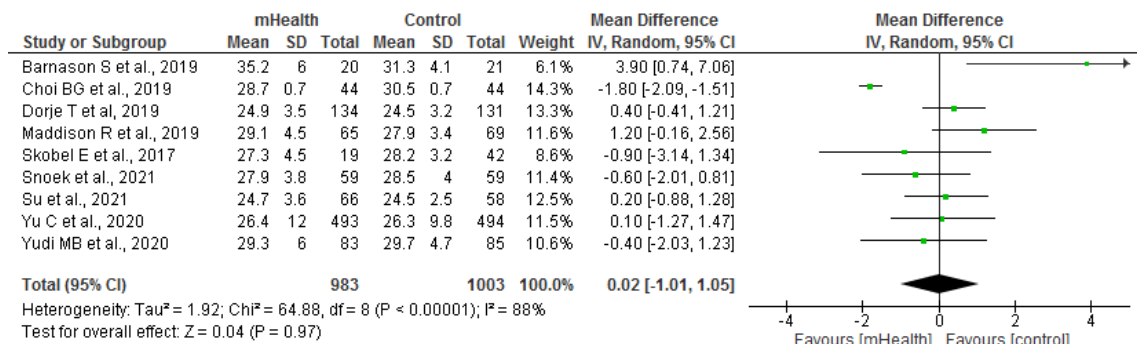

## Waist circumference

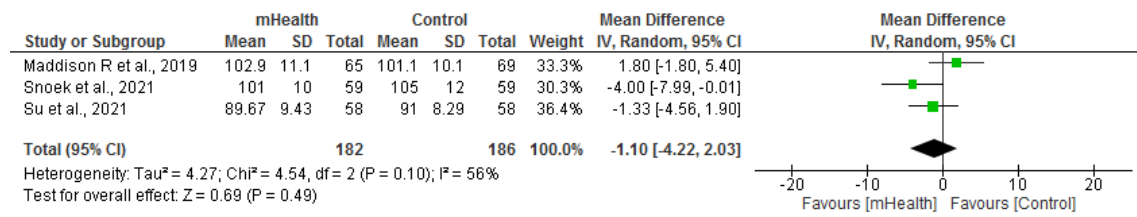

Supplement: mhealth_v10i12e39593_app6.pdf [file mhealth_v10i12e39593_app6.pdf]
