# Supplementary material for: Effectiveness of mHealth Interventions in the Control of Lifestyle and Cardiovascular Risk Factors in Patients After a Coronary Event: Systematic Review and Meta-analysis
Source: PubMed Central journal article supplement (PMC9758644; doi:10.2196/39593), 2022-12-02

**Supplementary figures S4.** Forest plots for changes in HbA1c, glucose, heart rate and smoking cessation.

**HbA1c**

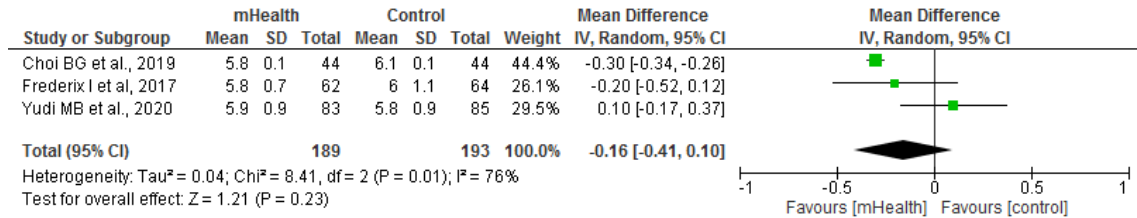

**Glucose**

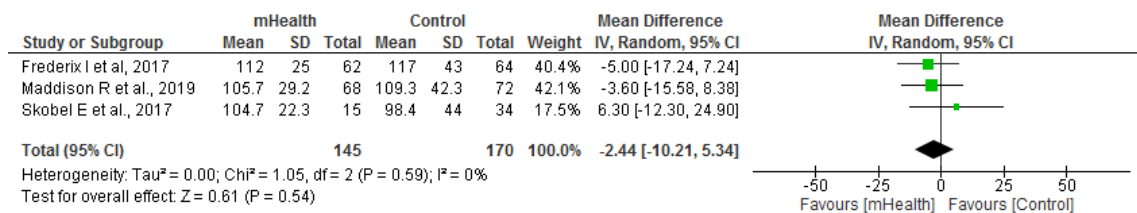

**Heart rate**

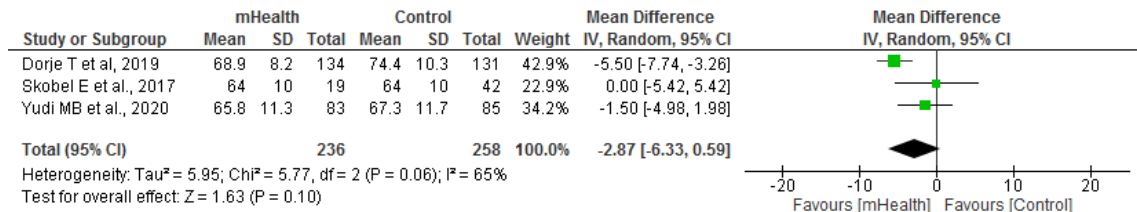

**Smoking cessation**

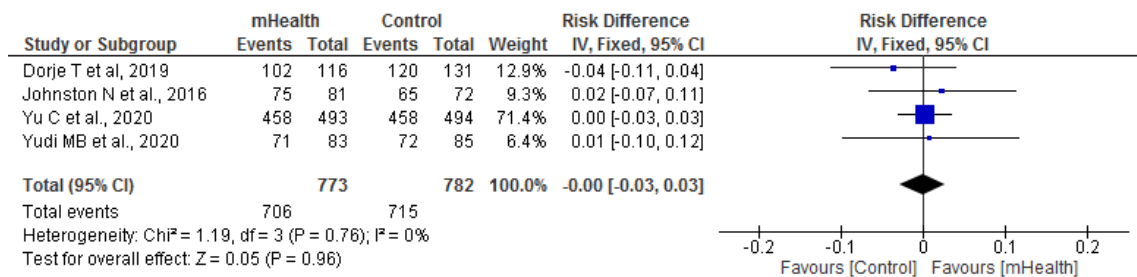

Supplement: mhealth_v10i12e39593_app7.pdf [file mhealth_v10i12e39593_app7.pdf]
