# Supplementary material for: Effectiveness of mHealth Interventions in the Control of Lifestyle and Cardiovascular Risk Factors in Patients After a Coronary Event: Systematic Review and Meta-analysis
Source: PubMed Central journal article supplement (PMC9758644; doi:10.2196/39593), 2022-12-02

## Supplementary figures S6. Forest plots for changes in anxiety, depression and quality of life.

### Anxiety

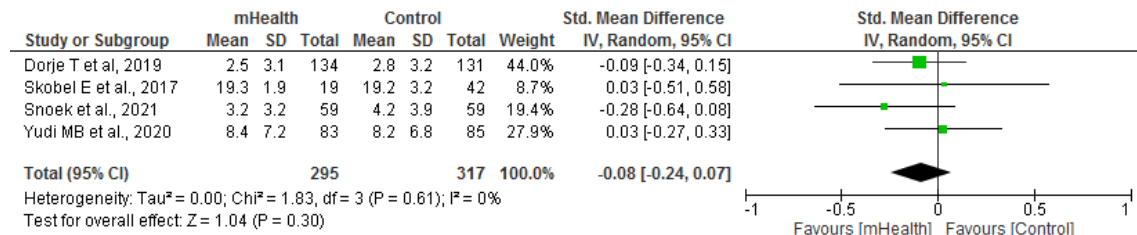

### Depression

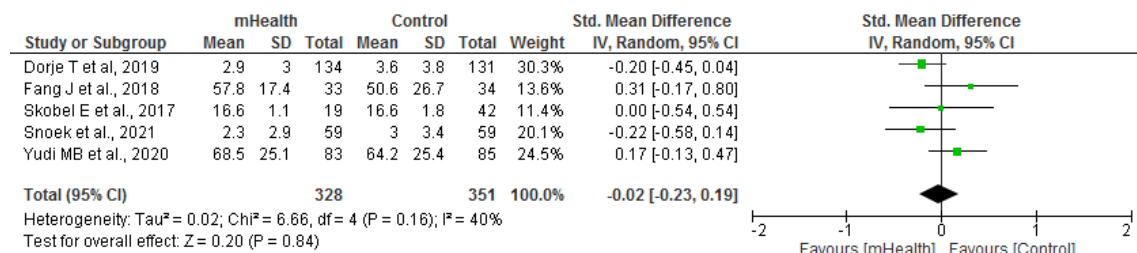

### Quality of life. General

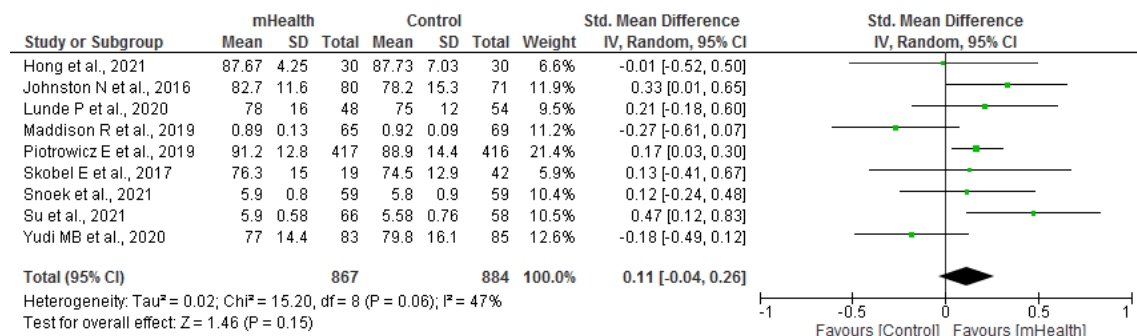

Supplement: mhealth_v10i12e39593_app9.pdf [file mhealth_v10i12e39593_app9.pdf]
