# Supplementary material for: Effectiveness of mHealth Interventions in the Control of Lifestyle and Cardiovascular Risk Factors in Patients After a Coronary Event: Systematic Review and Meta-analysis
Source: PubMed Central journal article supplement (PMC9758644; doi:10.2196/39593), 2022-12-02
Supplement: mhealth_v10i12e39593_app11.pdf [file mhealth_v10i12e39593_app11.pdf]

**Supplementary Table S4.** Sensitivity analysis.**6 minutes walk test sensitivity analysis**

| <b>Study removed from meta-analysis</b> | <b>Mean difference</b> | <b>CI 95%</b> | <b>p</b> |
|-----------------------------------------|------------------------|---------------|----------|
| Dorje et al., 2019                      | 21.76                  | 11.30-32.23   | 0.0001   |
| Fang et al., 2018                       | 20.51                  | 9.99-31.03    | 0.0001   |
| Piotrowicz et al., 2019                 | 23.76                  | 12.54-34.97   | 0.0001   |
| Yudi et al., 2020                       | 20.96                  | 11.69-30.23   | 0.00001  |

**Quality of life. Physical dimension sensitivity analysis**

| <b>Study removed from meta-analysis</b> | <b>Mean difference</b> | <b>CI 95%</b> | <b>p</b> |
|-----------------------------------------|------------------------|---------------|----------|
| Dorje et al., 2019                      | 0.28                   | 0.01-0.54     | 0.04     |
| Fang et al., 2018                       | 0.22                   | 0.06-0.39     | 0.009    |
| Frederix et al., 2017                   | 0.22                   | 0.01-0.44     | 0.04     |
| Hong et al., 2021                       | 0.30                   | 0.13-0.47     | 0.0004   |
| Lunde et al., 2020                      | 0.29                   | 0.07-0.51     | 0.009    |

**Quality of life. Mental dimension sensitivity analysis**

| <b>Study removed from meta-analysis</b> | <b>Mean difference</b> | <b>CI 95%</b> | <b>p</b> |
|-----------------------------------------|------------------------|---------------|----------|
| Dorje et al., 2019                      | 0.32                   | 0.04-0.60     | 0.03     |
| Fang et al., 2018                       | 0.19                   | 0.02-0.35     | 0.03     |
| Frederix et al., 2017                   | 0.30                   | 0.03-0.57     | 0.03     |
| Hong et al., 2021                       | 0.31                   | 0.07-0.54     | 0.010    |
| Lunde et al., 2020                      | 0.27                   | 0.00-0.53     | 0.05     |

**Physical activity sensitivity analysis**

| <b>Study removed from meta-analysis</b> | <b>Mean difference</b> | <b>CI 95%</b> | <b>p</b> |
|-----------------------------------------|------------------------|---------------|----------|
| Duscha et al., 2018                     | 0.38                   | -0.07-0.84    | 0.09     |
| Lunde et al., 2020                      | 0.47                   | -0.11-1.05    | 0.11     |
| Snoek et al., 2021                      | 0.59                   | 0.27-0.91     | 0.0003   |
| Su et al., 2021                         | 0.23                   | -0.08-0.54    | 0.14     |

**Rehospitalization all causes sensitivity analysis**

| <b>Study removed from meta-analysis</b> | <b>Mean difference</b> | <b>CI 95%</b> | <b>p</b> |
|-----------------------------------------|------------------------|---------------|----------|
| Piotrowicz et al., 2019                 | -0.03                  | -0.06-0.00    | 0.07     |
| Widmer et al., 2017                     | -0.02                  | -0.05-0.00    | 0.07     |
| Yu et al., 2020                         | -0.05                  | -0.10-0.01    | 0.10     |
| Yudi et al., 2020                       | -0.03                  | -0.05-0.00    | 0.05     |

### Rehospitalization cardiovascular causes sensitivity analysis

| <b>Study removed from meta-analysis</b> | <b>Mean difference</b> | <b>CI 95%</b> | <b>p</b> |
|-----------------------------------------|------------------------|---------------|----------|
| Piotrowicz et al., 2019                 | -0.03                  | -0.07-0.01    | 0.15     |
| Snoek et al., 2021                      | -0.03                  | -0.07-0.00    | 0.06     |
| Su et al., 2021                         | -0.05                  | -0.09 - -0.01 | 0.02     |
| Treskes et al., 2020                    | -0.03                  | -0.07-0.00    | 0.08     |
| Widmer et al., 2017                     | -0.03                  | -0.06 – 0.01  | 0.11     |
| Yudi et al., 2020                       | -0.04                  | -0.07 - -0.00 | 0.05     |
